# Supplementary material for: Massive clonal expansion of polycytotoxic skin and blood CD8+ T cells in patients with toxic epidermal necrolysis patients
Source: PubMed Central journal article supplement (PMC7978430; doi:10.1126/sciadv.abe0013), 2021-03-19
Supplement: abe0013_SM.pdf [file abe0013_SM.pdf]

## Supplementary Materials for

### **Massive clonal expansion of polycytotoxic skin and blood CD8<sup>+</sup> T cells in patients with toxic epidermal necrolysis patients**

Axel Patrice Villani, Aurore Rozieres, Benoît Bensaid, Klara Kristin Eriksson, Amandine Mosnier, Floriane Albert, Virginie Mutez, Océane Brassard, Tugba Baysal, Mathilde Tardieu, Omran Allatif, Floriane Fusil, Thibault Andrieu, Denis Jullien, Valérie Dubois, Catherine Giannoli, Henri Gruffat, Marc Pallardy, François-Loïc Cosset, Audrey Nosbaum, Osami Kanagawa, Janet L. Maryanski, Daniel Yerly, Jean-François Nicolas, Marc Vocanson\*

\*Corresponding author. Email: marc.vocanson@inserm.fr

Published 19 March 2021, *Sci. Adv.* 7, eabe0013 (2021)  
DOI: 10.1126/sciadv.abe0013

#### **This PDF file includes:**

Tables S1 to S12  
Figs. S1 to S17

| Biological investigations |                 |              |                |                                    |
|---------------------------|-----------------|--------------|----------------|------------------------------------|
|                           | CyTOF           | TCRV $\beta$ | TCR sequencing | TCR transfectant stimulation assay |
| TEN-1                     |                 | D0           | -              | -                                  |
| TEN-2                     | -               | D0           | D0*            | -                                  |
| TEN-3                     | D0              | D0           | D0             | D2                                 |
| TEN-4                     | D0              | D0           | D0             | -                                  |
| TEN-5                     |                 | D0           | D0             | -                                  |
| TEN-6                     | -               | D0           | D0             | -                                  |
| TEN-7                     | D1              | D0           | D1             | D2                                 |
| TEN-8                     | -               | D0           | D1             | -                                  |
| TEN-9                     | D1              | D0           | D1             | -                                  |
| TEN-10                    | D0              | D2           | D0             | D0 & D2                            |
| TEN-11                    | -               | D0           | D2             | -                                  |
| TEN-12                    | -               | -            | D0             | -                                  |
| TEN-13                    | -               | D0           | D2             | -                                  |
| TEN-14                    | -               | -            | D1*            | -                                  |
| TEN-15                    | D1              | D1           | D1             | D1                                 |
| TEN-16                    | -               | -            | D1             | -                                  |
| TEN-17                    | D0              | -            | -              | -                                  |
| TEN-18                    | D0 <sup>‡</sup> | -            | -              | -                                  |
| MPE-1                     | -               | -            | D1             | -                                  |
| MPE-2                     | -               | -            | D1             | -                                  |
| MPE-3                     | -               | D1           | D1             | -                                  |
| MPE-4                     | -               | D1           | D1             | -                                  |
| MPE-5                     | -               | D1           | D1             | -                                  |
| MPE-6                     | -               | -            | D1             | -                                  |
| MPE-7                     | -               | D1           | D1             | -                                  |
| MPE-8                     | -               | D1           | -              | -                                  |
| MPE-9                     | D1              | -            | -              | -                                  |
| MPE-10                    | D1              | -            | -              | -                                  |
| MPE-11                    | D1              | -            | -              | -                                  |
| MPE-12                    | D1              | -            | -              | -                                  |
| MPE-13                    | D2              | -            | -              | -                                  |
| MPE-14                    | D1              | -            | -              | -                                  |

**Table S1. Sampling days and subsequent biological analysis.**

Table describes the days at which samples were collected after patient's arrival to the hospital (all from day 0 to day 2), as well as the corresponding biological investigations performed on these samples.

\*Blister and PBMC samples for TCR sequencing were collected as indicated in the table, except for TEN-2 and TEN-14, for which PBMC samples were performed at 1 day of interval.

<sup>‡</sup>For patient TEN-18, the cytotoxic but not the lineage phenotype was excluded from the analysis due to a technical problem.

| Antibodies and panel information |                                 |               |                 |                    |
|----------------------------------|---------------------------------|---------------|-----------------|--------------------|
| Isotope Channel                  | Antibody/reagent name           | Clone         | Source          | Category           |
| 191/193 Ir                       | DNA                             |               | Miltenyi        | Cells isolation    |
| 194Pt                            | Viability                       |               | Miltenyi        | Viability          |
| 89Y                              | CD45                            | HI30          | Fluidigm        | Lineage            |
| 142Nd                            | CD19                            | LT19          | Miltenyi        | Lineage            |
| 144Nd                            | TCR V $\alpha$ 14-J $\alpha$ 18 | 6B11          | Miltenyi        | Lineage            |
| 145Nd                            | CD11c                           | M54-27G12     | Miltenyi        | Lineage            |
| 148Nd                            | CD14                            | TUK4          | Miltenyi        | Lineage            |
| 150Nd                            | CD11b                           | M1/70.15.11.5 | Miltenyi        | Lineage            |
| 153Eu                            | CD45RA                          | T6D11         | Miltenyi        | Lineage            |
| 155Gd                            | CD8 $\beta$                     | SID18BEE      | Miltenyi        | Lineage            |
| 158Gd                            | CCR7(CD197)                     | FR11-11EB     | Miltenyi        | Lineage            |
| 159Tb                            | TCR V $\alpha$ 7.2              | REA179        | Miltenyi        | Lineage            |
| 164Dy                            | CD4                             | VIT4          | Miltenyi        | Lineage            |
| 166Er                            | NKp46                           | 9 E2          | Miltenyi        | Lineage            |
| 168Er                            | TCR $\alpha\beta$               | BW242/412     | Miltenyi        | Lineage            |
| 169Tm                            | CD8 $\alpha$                    | BW135/80      | Miltenyi        | Lineage            |
| 175Lu                            | TCR $\gamma\delta$              | 11F2          | Miltenyi        | Lineage            |
| 141Pr                            | CD56                            | HCD56         | Miltenyi        | Lineage/Activation |
| 146Nd                            | CD107a                          | H4A3          | Miltenyi        | Activation         |
| 152Sm                            | CD27                            | M-T271        | Miltenyi        | Activation         |
| 163Di                            | CD57                            | HCD57         | Miltenyi        | Activation         |
| 167Er                            | CD38                            | REA572        | Miltenyi        | Activation         |
| 170Er                            | CD137                           | 4B4-1         | Miltenyi        | Activation         |
| 171Yb                            | Annexin A1                      | 74/3          | Miltenyi        | Activation         |
| 172Yb                            | CD253                           | RIK2.1        | Miltenyi        | Activation         |
| 174Yb                            | CD226                           | DX11          | Miltenyi        | Activation         |
| 147Sm                            | PERF                            | delta G9      | Miltenyi        | Cytotoxicity       |
| 149Sm                            | GzmB                            | REA226        | Miltenyi        | Cytotoxicity       |
| 151Eu                            | GzmA                            | REA162        | Miltenyi        | Cytotoxicity       |
| 161Dy                            | CD255                           | CARL-1        | Miltenyi        | Cytotoxicity       |
| 162Dy                            | GNLY                            | AF3138        | Miltenyi        | Cytotoxicity       |
| 154Sm                            | V-beta 13.2                     | H132          | Beckman Coulter | TCR                |
| 156Gd                            | V-beta 7.2                      | ZIZOU4        | Beckman Coulter | TCR                |
| 160Gd                            | V-beta 21.3                     | IG125         | Beckman Coulter | TCR                |

**Table S2. Antibodies and panel information.**

**A**

| Patient ID | Total templates | Productive templates | Productive fraction | Productive rearrangements | Productive clonality | TRB accounting for >0.5% total |                        |
|------------|-----------------|----------------------|---------------------|---------------------------|----------------------|--------------------------------|------------------------|
|            |                 |                      |                     |                           |                      | N TRB sequences                | Cum% of TRB repertoire |
| TEN-2      | 15156           | 12345                | 0.81                | 10051                     | 0.03                 | 1                              | 3.65                   |
| TEN-3      | 9911            | 9083                 | 0.92                | 2612                      | 0.55                 | 2                              | 63.40                  |
| TEN-4      | 7602            | 5904                 | 0.78                | 2261                      | 0.17                 | 16                             | 29.97                  |
| TEN-5      | 951             | 718                  | 0.76                | 452                       | 0.06                 | 18                             | 22.98                  |
| TEN-6      | 27148           | 24951                | 0.92                | 2568                      | 0.61                 | 9                              | 77.04                  |
| TEN-7      | 135218          | 109695               | 0.81                | 32357                     | 0.17                 | 7                              | 14.26                  |
| TEN-8      | 91287           | 73280                | 0.80                | 56653                     | 0.03                 | 2                              | 1.70                   |
| TEN-9      | 24344           | 23321                | 0.96                | 1745                      | 0.69                 | 6                              | 85.44                  |
| TEN-10     | 115687          | 111243               | 0.96                | 4319                      | 0.87                 | 2                              | 89.60                  |
| TEN-11     | 7408            | 5691                 | 0.77                | 836                       | 0.36                 | 24                             | 70.64                  |
| TEN-12     | 16159           | 12809                | 0.79                | 8121                      | 0.09                 | 5                              | 11.66                  |
| TEN-13     | 2564            | 2163                 | 0.84                | 1134                      | 0.21                 | 9                              | 33.24                  |
| TEN-14     | 37,685          | 30113                | 0.80                | 18898                     | 0.04                 | 0                              | 0                      |
| TEN-15     | 51687           | 30309                | 0.58                | 2111                      | 0.59                 | 11                             | 69.94                  |
| TEN-16     | 15801           | 12384                | 0.78                | 4962                      | 0.13                 | 10                             | 13.64                  |
| MPE-1      | 64906           | 53041                | 0.81                | 19223                     | 0.08                 | 2                              | 1.70                   |
| MPE-2      | 211797          | 170222               | 0.80                | 68346                     | 0.07                 | 0                              | 0                      |
| MPE-3      | 45946           | 36899                | 0.80                | 14225                     | 0.09                 | 2                              | 2.39                   |
| MPE-4      | 7087            | 5775                 | 0.81                | 2757                      | 0.09                 | 17                             | 14.61                  |
| MPE-5      | 10537           | 8457                 | 0.80                | 5139                      | 0.06                 | 8                              | 6.83                   |
| MPE-6      | 5114            | 4280                 | 0.84                | 2364                      | 0.15                 | 4                              | 20.68                  |
| MPE-7      | 48944           | 39474                | 0.81                | 20772                     | 0.07                 | 3                              | 2.38                   |

**B**

| Patient ID | Total templates | Productive templates | Productive fraction | Productive rearrangements | Productive clonality | TRB accounting for >0.5% total |                        |
|------------|-----------------|----------------------|---------------------|---------------------------|----------------------|--------------------------------|------------------------|
|            |                 |                      |                     |                           |                      | N TRB sequences                | Cum% of TCB repertoire |
| TEN-2      | 42212           | 33656                | 0.80                | 26806                     | 0.02                 | 1                              | 0.65                   |
| TEN-3      | 25349           | 21559                | 0.85                | 12802                     | 0.12                 | 11                             | 16.70                  |
| TEN-4      | 22380           | 16933                | 0.76                | 6559                      | 0.16                 | 9                              | 18.68                  |
| TEN-5      | 97423           | 77785                | 0.80                | 38437                     | 0.15                 | 16                             | 17.01                  |
| TEN-6      | 45198           | 36165                | 0.80                | 24135                     | 0.11                 | 11                             | 16.86                  |
| TEN-7      | 68825           | 50224                | 0.73                | 21623                     | 0.22                 | 10                             | 29.79                  |
| TEN-8      | 18785           | 15003                | 0.80                | 13198                     | 0.01                 | 1                              | 0.55                   |
| TEN-9      | 857             | 676                  | 0.79                | 471                       | 0.06                 | 14                             | 22.63                  |
| TEN-10     | 5087            | 4021                 | 0.79                | 3170                      | 0.04                 | 4                              | 5.65                   |
| TEN-11     | 19359           | 15443                | 0.80                | 9465                      | 0.08                 | 4                              | 8.01                   |
| TEN-12     | 108801          | 87610                | 0.81                | 71003                     | 0.02                 | 1                              | 0.86                   |
| TEN-13     | 97529           | 80175                | 0.82                | 57810                     | 0.03                 | 1                              | 0.81                   |
| TEN-14     | 20670           | 17286                | 0.84                | 11424                     | 0.01                 | 4                              | 22.5                   |
| TEN-15     | 29410           | 24394                | 0.83                | 15989                     | 0.1                  | 6                              | 15.21                  |
| TEN-16     | 61236           | 47672                | 0.78                | 19237                     | 0.27                 | 11                             | 33.27                  |
| MPE-3      | 23185           | 18627                | 0.80                | 10726                     | 0.12                 | 11                             | 15.74                  |
| MPE-4      | 6152            | 4815                 | 0.78                | 4176                      | 0.02                 | 3                              | 4.38                   |
| MPE-5      | 11093           | 8560                 | 0.77                | 6762                      | 0.06                 | 5                              | 10.68                  |
| MPE-6      | 80269           | 65498                | 0.82                | 50441                     | 0.02                 | 2                              | 1.31                   |
| MPE-7      | 31855           | 25294                | 0.79                | 17336                     | 0.04                 | 2                              | 1.54                   |

**Table S3: Raw parameters of TRBV repertoire analysis.**

Genomic DNA extracted from blister and skin (**A**) or PBMC (**B**) samples from 15 TEN and 7 MPE patients were used for survey level deep sequencing of the TCR $\beta$ -chain, using ImmunoSEQ<sup>TM</sup> platform. Data were analyzed using ImmunoSEQ<sup>TM</sup> analyser toolset. Table describes raw parameters of TCR repertoire analysis.

Total template: the sum of templates for all rearrangements in the sample. Productive templates: the sum of templates for all productive rearrangements in the sample. Fraction productive: the fraction of productive templates among all templates. Productive rearrangement: the count of unique rearrangements in the sample that are in-frame and do not contain a stop codon. Productive rearrangements can produce a functional protein receptor. Productive clonality: a statistic for how much of the repertoire is made of up of expanded clones. Number and cumulative percentage of TRBV sequences, representing > 0.5% of total TRBV repertoire.

|                            | MPE (n=7) | TEN (n=15) | Healthy donors (n=44) |
|----------------------------|-----------|------------|-----------------------|
| Mean productive clonality  | 0.053     | 0.092      | 0.099                 |
| Standard Deviation         | 0.039     | 0.065      | 0.056                 |
| Standard Error of Mean     | 0.018     | 0.017      | 0.008                 |
| t-test (vs healthy donors) | ns        | ns         |                       |

**Table S4: Comparison of productive clonality in PBMC samples from TEN, MPE patients and healthy donors.**

ns. Student t test (two-tailed).

| Patient | V family     | TRBV         | TRBD         | TRBJ         | Templates          | Amino-acid                                                                            | CDR3 rearrangement                                                                     | Productive frequency | Respective anti-Vβ mAb    | % Vβ+ cells among CD3+CD8+ T cells as determined by FACs analysis |
|---------|--------------|--------------|--------------|--------------|--------------------|---------------------------------------------------------------------------------------|----------------------------------------------------------------------------------------|----------------------|---------------------------|-------------------------------------------------------------------|
| TEN-2   | TRBV09       | TRBV09-01    | TRBD02-01*01 | TRBJ02-01*01 | 450                | CASSVDLSGNEQFF                                                                        | CTGAGCTCTCGAGCTGGGGGACTCAGCTTGTATTTCTGTGCCAGCAGCTAGATCTGCGGGGAATGAGCAGTCTTCGGGGCCA     | 3.64                 | Vb 1                      | 27.00                                                             |
|         | TRBV06       | TRBV06-06    | unresolved   | TRBJ02-01*01 | 28                 | CASSYVLEQFF                                                                           | CTCAGGCTGGAGTGGCTGCTCCCTCCCAAGACATCTGTGTACTTCTGTGCCAGCAGTCAATCACTGATGAGCAGTCTTCGGGGCCA | 0.23                 | Vb 13.6                   | 2.55                                                              |
|         | TRBV02       | TRBV02-01*01 | TRBD02-01*01 | TRBJ02-07*01 | 21                 | CASSLEQGLSYEQYF                                                                       | TCCAAAGCTGGAGGACTCAGCCATGTACTTCTGTGCCAGCAGTGAACAACCTAGCGGGGGTCTCTACGAGCAGTACTTCGGGGCCA | 1.17                 | Vb 2.6                    | 5.75                                                              |
|         | TRBV06       | TRBV06-05*01 | unresolved   | TRBJ01-02*01 | 19                 | CASSQRDGYGYTF                                                                         | AGGCTGTGTGGCTGCTCCCTCCAGACATCTGTGTACTTCTGTGCCAGCAGCAAAAGGAGCGGATGATGCTACACCTTCGGTTCG   | 0.15                 | Vb 13.1                   | na                                                                |
| TRBV06  | TRBV06-05*01 | TRBD01-01*01 | TRBJ02-05*01 | 19           | CASSYANTYQEQYF     | CTGTGGCTGCTCCCTCCAGACATCTGTGTACTTCTGTGCCAGCAGTGAACAACCTAGCGGGGGTCTTCGGGGCCA           | 0.15                                                                                   | Vb 13.1              | 13.7                      |                                                                   |
| TEN-3   | TRBV11       | TRBV11-02*02 | unresolved   | TRBJ02-01*01 | 5621               | CASSPFRDSYNEQFF                                                                       | CAGCCTCAAGGCTTGGAGCTGGCGCTGTATCTGTGCCAGCAGCCCTTCGGTACTCTCAATGAGCAGTCTTCGGGGCCA         | 61.88                | Vb 21.3                   | 57.00                                                             |
|         | TRBV19       | TRBV19-01    | TRBD01-01*01 | TRBJ01-05*01 | 138                | CATLDKRYSNQPHF                                                                        | GTGACATCGCCCAAAAAGACCCAGCAGCTTCTGTCTGTGCCACTTGGACAGATATAGCAATCAGCCCGCAGCTTTGGTGTAT     | 1.52                 | Vb 17.7                   | 1.02                                                              |
|         | TRBV19       | TRBV19-01    | TRBD02-01*02 | TRBJ01-02*01 | 39                 | CASSEGSYGYTF                                                                          | CTCAGCTGTACATCGCCCAAAAAGAACCCGACGCTTCTATCTGTGCCAGTAGTGGGGCAGCTATGGTCAACCTTCGGTTCG      | 0.43                 | Vb 17                     | na                                                                |
|         | TRBV09       | TRBV09-01    | unresolved   | TRBJ02-01*01 | 17                 | CASSVSGTNSNEQFF                                                                       | AGCTCTGTGGAGCTGGGGGACTCAGCTTGTATTTCTGTGCCAGCAGTGTCCAGCGACAGTACCAATGACCAATCTTCGGGGCCA   | 0.19                 | Vb 1                      | 3.61                                                              |
| TRBV06  | TRBV06-01*01 | unresolved   | TRBJ02-02*01 | 16           | CASSEARGSGELFF     | GAGTGTGCTCTCCCTCCAGACATCTGTGTACTTCTGTGCCAGCAGTGAACAACCTAGCGGGGGTCTTCGGGGCCA           | 0.18                                                                                   | na                   | na                        |                                                                   |
| TEN-4   | TRBV05       | TRBV05-06*01 | TRBD02-01    | TRBJ02-01*01 | 348                | CASSPSENEQFF                                                                          | AATGTGACGCTTGTGTGGGGGACTCGCCCTCTATCTGTGCCAGCAGTCTTCTAGCGAAATGAGCAGTCTTCGGGGCCA         | 5.89                 | Vb 5.2                    | 2.75                                                              |
|         | TRBV28       | TRBV28-01*01 | TRBD02-01    | TRBJ02-07*01 | 248                | CASLGTSSYEQYF                                                                         | ATTCCTGAGTCCGCGACCAACAGACATCTATGTACTTCTGTGCCAGCAGTCTTCTAGCGAAATGAGCAGTCTTCGGGGCCA      | 4.20                 | Vb 3                      | 24.2                                                              |
|         | TRBV30       | TRBV30-01*01 | TRBD01-01*01 | TRBJ02-07*01 | 185                | CAGQAREQYF                                                                            | TTCACTGTAGTATGAAGCTCTCTCTGAGTACTTGTGTACTTCTGTGCCAGCAGTCTTCTAGCGAAATGAGCAGTCTTCGGGGCCA  | 3.13                 | Vb 20                     | 1.56                                                              |
|         | TRBV29       | TRBV29-01*01 | unresolved   | TRBJ02-03*01 | 180                | CSVLQTDQYF                                                                            | TCTACTGTGAGCAATGAGCCTTGAAGCAGCAGCATATATCTGTGCCAGCAGTCTTCTAGCGAAATGAGCAGTCTTCGGGGCCA    | 3.05                 | Vb 4                      | 3.33                                                              |
| TRBV14  | TRBV14-01*01 | TRBD01-01*01 | TRBJ02-07*01 | 167          | CASSPLTSGSQYF      | CAGCCTCGAAGACTGGAGATTTGGAGTATTTCTGTGCCAGCAGCCATCTTTCAGCGAGGCGCGGAGCAGTACTTCGGGGCCA    | 2.83                                                                                   | Vb 16                | 3.62                      |                                                                   |
| TEN-5   | TRBV15       | TRBV15-01*01 | TRBD02-01*01 | TRBJ02-05*01 | 49                 | CATSRDVAAGGQYF                                                                        | CGCTCACAGGCTGGGGGACGACGACTGTACTTGTGCCAGCAGTGAAGTGGTGGGGGGCTAGCTCTCAAGCAGTACTTCGGGGCCA  | 6.82                 | na                        | na                                                                |
|         | TRBV14       | TRBV14-01*01 | na           | TRBJ02-07*01 | 18                 | CASSHLQGGGEQYF                                                                        | CAGCCTCGAAGACTGGAGTGTGGAGTATTTCTGTGCCAGCAGCCTTTCGGGGGGTGGGGGAGCAGTACTTCGGGGCCA         | 2.51                 | Vb 16                     | 1.88                                                              |
|         | TRBV06       | TRBV06-05*01 | TRBD02-01*01 | TRBJ02-02*01 | 12                 | CASSPTNGGQYF                                                                          | CTGTGGCTGCTCCCTCCAGACATCTGTGTACTTGTGCCAGCAGTCCAGCAAAAAGGGGGGGTGGTACACTTCGGTTCG         | 1.67                 | Vb 13.1                   | 0.94                                                              |
|         | TRBV10       | TRBV10-03*01 | na           | TRBJ01-02*01 | 11                 | CAISGAANYGYTF                                                                         | CTGGAGTCCGCTCAGCCTCCAGACATCTGTGTACTTCTGTGCCAGCAGTGTCCAGCAGTCAAGCAATGCTACACCTTCGGTTCG   | 1.53                 | Vb 12                     | 1.7                                                               |
| TRBV04  | TRBV04-03*01 | TRBD02-01    | TRBJ01-04*01 | 10           | CASSQDLSYKELFF     | CACACCTCGACGAGCAAGACTCGGCCCTGTACTCTGTGCCAGCAGCAAGACTCTCGGACTATGAAAATGTTTTGGAGT        | 1.59                                                                                   | Vb 7.2               | 9.15                      |                                                                   |
| TEN-6   | TRBV21       | TRBV21-01*01 | TRBD01-01*01 | TRBJ01-04*01 | 8509               | CASSDRGRNTKELFF                                                                       | TCGACGGAGTCAAGGACACAGCAGTATTTCTGTGCCAGCAGCAGGAGGAGGAGTCAATGAAAATGTTTTGGAGT             | 34.10                | na                        | na                                                                |
|         | TRBV28       | TRBV28-01*01 | unresolved   | TRBJ01-04*01 | 8503               | CASSGPNKELFF                                                                          | CAGAGTCCGCGCAGCAACCAAGACATCTGTACTTCTGTGCCAGTGTGGGGGGCTAATGAAAATGTTTTGGAGT              | 34.08                | Vb 3                      | 48.1                                                              |
|         | TRBV18       | TRBV18-01*01 | TRBD01-01*01 | TRBJ01-02*01 | 695                | CASSPQGRSYGYTF                                                                        | CAGCAGGATCGGAGGAGTTCGGCAGCTTATTTCTGTGCCAGCAGCAGGAGGAGGAGTCAATGAAAATGTTTTGGAGT          | 2.79                 | Vb 18                     | 3.26                                                              |
|         | TRBV06       | TRBV06-04    | TRBD02-01    | TRBJ01-02*01 | 508                | CASSLEPGDSVYGYTF                                                                      | CTCTGCTACCTCTCAGACATCTGTGTACTTCTGTGCCAGCAGTGTGAACTGGGACTCGGTCTATGCTACACCTTCGGTTCG      | 2.04                 | na                        | na                                                                |
| TRBV03  | unresolved   | TRBD01-01*01 | TRBJ01-03*01 | 297          | CASSQERGRDITF      | ATCAATCCCTGGAGCTTGTGTACTTCTGTGCCAGCAGCAAGAAAGGGGAGGAGCAGCACAATATTTGGAGT               | 4.19                                                                                   | Vb 9                 | 3.56                      |                                                                   |
| TEN-7   | TRBV02       | TRBV02-01*01 | TRBD02-01*01 | TRBJ02-07*01 | 5168               | CASSEVWAGASSYEQYF                                                                     | ACAAGTGTGAGGACTCAGCCATGTACTTGTGCCAGCAGTGAAGTGGTGGGGGGCTAGCTCTCAAGCAGTACTTCGGGGCCA      | 1.71                 | Vb 22                     | 2.46                                                              |
|         | TRBV05       | TRBV05-05*01 | TRBD01-01*01 | TRBJ01-01*01 | 3889               | CASSLNDRSNTAEFF                                                                       | CGCTTGTGTGCCGGGACTCGCCCTGTACTTGTGCCAGCAGCTGAAAGAGGAGGAGTCAATGAAAATGTTTTGGAGT           | 3.55                 | Vb 5.3                    | 3.6                                                               |
|         | TRBV06       | unresolved   | TRBD02-01*02 | TRBJ02-01*01 | 3588               | CASSPTSSNEQFF                                                                         | GAGTGGCTGCTCCCTCCAAACATCTGTGTACTTGTGCCAGCAGCAGCTAGCGGGAGTGAATGAGCAGTCTTCGGGGCCA        | 3.27                 | Vb 13.1; Vb 13.2; Vb 13.6 | 9.25                                                              |
|         | TRBV06       | TRBV06-05*01 | TRBD02-01*01 | TRBJ01-02*01 | 1168               | CASSLGGEGYTF                                                                          | CTCAGGCTGTGGCTGCTCCCTCCAGACATCTGTGTACTTGTGCCAGCAGTCTCGGGGAGGAGGCTACACCTTCGGTTCG        | 1.06                 | Vb 13.1                   | 4.39                                                              |
| TRBV04  | TRBV04-01*01 | TRBD02-01    | TRBJ02-07*01 | 652          | CASSQDELEQYF       | TTTCACTCAACGCTCGAGCAGAAGACTCAGCCCTGTACTTGTGCCAGCAGCAAGTGAAGTGGTGGGGGGTGAAGTGGTGGGGGG  | 0.59                                                                                   | Vb 7.1               | 1.25                      |                                                                   |
| TEN-8   | TRBV11       | TRBV11-03*01 | TRBD01-01*01 | TRBJ01-05*01 | 775                | CASSNPTGGHNSNPQHF                                                                     | GAGCTGGGAGCTCGCCGTGTACTTGTGCCAGCAGCAACCCAGGGGAGGAGGAGTCAATGAAAATGTTTTGGAGT             | 1.06                 | na                        | na                                                                |
|         | TRBV27       | TRBV27-01*01 | TRBD01-01*01 | TRBJ02-03*01 | 471                | CASRGTPTDQYF                                                                          | CTGATCTGTGGAGTCCGCAACCCCAACAGCAGCTCTGTACTTGTGCCAGCAGTGAAGTGGTGGGGGGTGAAGTGGTGGGGGG     | 0.64                 | Vb 14                     | 1.2                                                               |
|         | TRBV04       | TRBV04-03*01 | na           | TRBJ02-02*01 | 289                | CASSPQGGNTGELFF                                                                       | ACCTCTGAGCAGCAAGACTCGCCCTGTACTTGTGCCAGCAGCAACCAAGGAGGGGGGAGCAACCGGGGAGCTTTTGGAGAA      | 0.39                 | Vb 7.2                    | 5.76                                                              |
|         | TRBV27       | TRBV27-01*01 | TRBD02-01    | TRBJ02-07*01 | 197                | CASSFTSYEQYF                                                                          | GTATCTGTGGAGTCCGCAACCCCAACAGCAGCTCTGTACTTGTGCCAGTCTACTAGCTCTCAAGCAGTACTTCGGGGCCA       | 0.27                 | Vb 14                     | 1.2                                                               |
| TRBV04  | TRBV04-03*01 | TRBD01-01*01 | TRBJ01-05*01 | 123          | CASSQAGSNQPHF      | ACCTCTGAGCAGAAAGACTCGCCCTGTACTTGTGCCAGCAGCAAGTGGTGGGGGGTGAAGTGGTGGGGGGTGAAGTGGTGGGGGG | 0.47                                                                                   | Vb 7.2               | 5.76                      |                                                                   |
| TEN-9   | TRBV02       | TRBV02-01*01 | TRBD02-01*02 | TRBJ01-05*01 | 10334              | CASSDVRGTSNPQHF                                                                       | TCACAAGCTGGAGGACTCAGCCCTGTACTTGTGCCAGCAGTGTGGGGGAGACTGCAATGAAAATGTTTTGGAGT             | 41.31                | na                        | 35.9                                                              |
|         | TRBV06       | TRBV06-01*06 | TRBD01-01*01 | TRBJ01-01*01 | 7373               | CASSVPRDMNTEAFF                                                                       | CGTCTCCCTCCAAACATCTGTGTACTTCTGTGCCAGTCTCGCATCGAGGAGCAGTGAACACTGAACTCTTCGGAGAA          | 31.62                | Vb 13.1; Vb 13.2; Vb 13.6 | 42.26                                                             |
|         | TRBV21       | TRBV21-01*01 | TRBD01-01*01 | TRBJ01-01*01 | 763                | CASSKHPLNTEAFF                                                                        | CAGTCCAGGACTCAGGCGAACAAGCAGTACTTGTGCCAGCAGCAACCAAGGCTTAAACACTGAAGCTTCTTCGGAGAA         | 3.27                 | na                        | na                                                                |
|         | TRBV29       | TRBV29-01*01 | TRBD02-01*01 | TRBJ01-02*01 | 737                | CSVHSFGASGYTF                                                                         | DTGAGCAACATGAGCCTGAAGACAGCAATATCTGTGCCAGTCTACTTGGGGGGGAGGAGTGGTCAACCTTCGGGCTCG         | 3.16                 | Vb 4                      | 5.86                                                              |
| TRBV24  | TRBV24       | na           | TRBJ02-01*01 | 590          | CATSPDPADDEQFF     | CTAGAGTCCGCTCCCAACAGCAGTCTTACTTGTGCCAGCAGCCCGCCCGCTGATGAGCAGTCTTCGGGGCCA              | 2.53                                                                                   | na                   | na                        |                                                                   |
| TEN-10  | TRBV28       | TRBV28-01*01 | TRBD02-01*01 | TRBJ01-04*01 | 99110              | CASSFGPNKELFF                                                                         | CTGGAGTCCGCGCAGCAACCAAGACATCTGTACTTGTGCCAGCAGTGTGGGGGGCTAATGAAAATGTTTTGGAGT            | 89.09                | Vb 3                      | na                                                                |
|         | TRBV28       | TRBV28-01*01 | na           | TRBJ02-02*01 | 566                | CASSPNSNTEAFF                                                                         | CTGGAGTCCGCGCAGCAACCAAGACATCTGTACTTGTGCCAGCAGCCCTGGAAGCAACCGGGGAGCTTTTGGAGAA           | 0.51                 | Vb 7                      | 93.9                                                              |
|         | TRBV04       | TRBV04-03*01 | TRBD01-01*01 | TRBJ02-07*01 | 376                | CASSQDLPVEYEQYF                                                                       | ACCTCTGAGCAGAAAGACTCGCCCTGTACTTGTGCCAGCAGCAAGTCTGGGGGGTGAAGTACGAGCAGTACTTCGGGGCCA      | 0.34                 | Vb 7.2                    | 0.88                                                              |
|         | TRBV07       | TRBV07-03*03 | TRBD02-01    | TRBJ02-02*01 | 374                | RASSFTGTGASGELFF                                                                      | CAGCAGAGCAGGGGACTCAGCCGCTGTACTTGTGCCAGCAGTCTCAGCGGACTGGGGGCTTGGGAGCTTTTGGAGAA          | 0.34                 | na                        | na                                                                |
| TRBV19  | TRBV19-01    | na           | TRBJ02-05*01 | 238          | CASSIRGGETQYF      | CTGTACTGTGGAGTCCCAAAAGAACCCAGCAGCTTCTACTTGTGCCAGTATAGGGGGGGGAGACCCAGTACTTCGGGGCCA     | 0.21                                                                                   | Vb 17                | 3.18                      |                                                                   |
| TEN-11  | TRBV12       | TRBV12       | TRBD01-01*01 | TRBJ02-05*01 | 760                | CASSLQETQYF                                                                           | CTGAAGACTCAGCCTCAGAACCCAGGACTCAGCTGTGTACTTGTGCCAGCAGTGTGGGGGGTGAAGTGGTGGGGGG           | 13.35                | na                        | na                                                                |
|         | TRBV05       | TRBV05-01*01 | unknown      | TRBJ01-02*01 | 706                | CASSLDDSGFYGYTF                                                                       | AGCACCTTGGAGTGGGGGACTCGCCCTTACTTGTGCCAGCAGTGTGGAGCAGCGGATTTATGGTCAACCTTCGGTTCG         | 12.41                | Vb 5.1                    | 11.9                                                              |
|         | TRBV04       | TRBV04-01*01 | unknown      | TRBJ01-01*01 | 379                | CASSQDTEAFF                                                                           | TTCTACTACAGCCCTCAGCAGAAAGACTCAGCCGTGTACTTGTGCCAGCAGCAAGGGGAGCACTGAAGCTTCTTCGGAGAA      | 6.66                 | Vb 7.1                    | 6.04                                                              |
|         | TRBV24       | TRBV24       | TRBD02-01*02 | TRBJ02-01*01 | 316                | CATEREWNEQFF                                                                          | CTCCTAGAGTCTGCCATCCCAACCAAGCAGCTTCTACTTGTGCCAGCAGGAGTGGGGAAATGAGCAGTCTTCGGGGCCA        | 5.55                 | na                        | na                                                                |
| TRBV05  | TRBV05-06*01 | unknown      | TRBJ01-05*01 | 194          | CASSLGYQPQHF       | CTGAATGAAAGCCTTGTGTGGGGGACTCGCCCTCTACTTGTGCCAGCAGTGTGGGCTATCAGCCAGCAGTTCGGTGTAT       | 3.41                                                                                   | Vb 5.2               | 0.086                     |                                                                   |
| TEN-12  | TRBV27       | TRBV27-01*01 | na           | TRBJ01-02*01 | 997                | CASSYHGAADGYTF                                                                        | CTGGAGTCCGCGCAGCAACCAAGCAGCTCTGTACTTGTGCCAGCAGTGTGGGGGGTGGGATGGTCAACCTTCGGTTCG         | 7.78                 | Vb 14                     | nd                                                                |
|         | TRBV04       | TRBV04-01*01 | TRBD02-01*01 | TRBJ02-02*01 | 187                | CASLTSSTGELFF                                                                         | CAGCCCTCGAGCAGAAAGACTCAGCCCTGTACTTGTGCCAGCAGCCTTACGCGGGGGTCCAGCGGGGAGCTTTTGGAGAA       | 1.46                 | Vb 7.1                    | na                                                                |
|         | TRBV07       | TRBV07-08*01 | TRBD01-01*01 | TRBJ02-07*01 | 130                | CASSLGGAYEQYF                                                                         | AAGATCAGCGCACACAGCAGGAGGACTCGCCCTGTACTTGTGCCAGCAGTGTGGGGGGTGAAGTACGAGCAGTACTTCGGGGCCA  | 1.01                 | na                        | na                                                                |
|         | TRBV05       | TRBV05-04*01 | TRBD02-01*01 | TRBJ02-07*01 | 107                | CASSLGRGGSYEQYF                                                                       | AAGCCTTGGAGCTGGAGCAGTGGCCCTGTACTTGTGCCAGCAGTGGTGGGGGGGCTCTCAGCAGCAGTACTTCGGGGCCA       | 0.84                 | na                        | na                                                                |
| TRBV04  | TRBV04-01*01 | TRBD01-01*01 | TRBJ01-02*01 | 73           | CASSPRHQINQYGYTF   | CGCCTCGAGCAGAAAGACTCAGCCCTGTACTTGTGCCAGCAGCCCAAGGGGATTAAGTGGTCAACCTTCGGTTCG           | 0.57                                                                                   | Vb 7.1               | nd                        |                                                                   |
| TEN-13  | TRBV04       | TRBV04-01*01 | TRBD01-01*01 | TRBJ01-02*01 | 565                | CASSQDLSGTGYTF                                                                        | CGCCTCGAGCAGAAAGACTCAGCCCTGTACTTGTGCCAGCAGCAAGATTTAGTCAAGGCTTGGTCAACCTTCGGTTCG         | 26.11                | Vb 1                      | 18.1                                                              |
|         | TRBV28       | TRBV28-01*01 | TRBD02-01*02 | TRBJ02-01*01 | 42                 | CASSHFLPAGLEEQFF                                                                      | TCGCGACAGCAACCAAGACATCTATGTACTTGTGCCAGCAGTCACTTCGGGACTAGCGGGGAGGAGCAGTCTTCGGGGCCA      | 1.94                 | Vb 7.3                    | 8.84                                                              |
|         | TRBV24       | TRBV24       | TRBD02-01    | TRBJ01-02*01 | 22                 | CATSDINQYGYTF                                                                         | TCCTAGTACTTGCATCCCAACCAAGCAGCTTCTACTTGTGCCAGCAGTATAGTAACTATGGTCAACCTTCGGTTCG           | 1.02                 | na                        | na                                                                |
|         | TRBV11       | TRBV11-03*01 | TRBD02-01    | TRBJ01-01*01 | 21                 | CASSVLAIEAFF                                                                          | AAGATCAGCCTGAGAGCTGGGGACTCGCCCTGTACTTGTGCCAGCAGTAAATTTAGCAAGGAAAGCTTCTTCGGAGAA         | 0.97                 | na                        | na                                                                |
| TRBV04  | TRBV04-03*01 | TRBD01-01*01 | TRBJ01-02*01 | 19           | CASSPNTGYSYGYTF    | CTACACCTCTCAGCAGAAAGACTCGCCCTGTACTTGTGCCAGCAGTCTTCAACCAAGGGGCTCTGCTCAACCTTCGGTTCG     | 0.88                                                                                   | Vb 7.2               | 0.59                      |                                                                   |
| TEN-14  | TRBV07       | TRBV07-03*01 | TRBD01-01*01 | TRBJ01-01*01 | 139                | CASSWTEIEAFF                                                                          | AAGATCAGCAGCAGCAGGCGGGGGACTCAGCCCTGTACTTGTGCCAGCAGTGTGGGGGGTGAAGCAGTAACTTTCGGAGAA      | 0.46                 | na                        | na                                                                |
|         | TRBV10       | TRBV10-03*01 | unknown      | TRBJ01-01*01 | 95                 | CAISESGALNTEAFF                                                                       | TGCGTCCAGCTCCCAAGACATCTGTGTACTTGTGCCAGCAGTGTGGGGGGTGAAGCAGTAACTTTCGGAGAA               | 0.32                 | Vb 12                     | na                                                                |
|         | TRBV29       | TRBV29-01*01 | unknown      | TRBJ02-02*01 | 94                 | CSVSGANTGELFF                                                                         | ACTGTGAGCAACATGAGCCTGAAGACAGCAGTATCTGTGCCAGTCTGGGGGGTGAAGCAGTAACTTTCGGAGAA             | 0.31                 | Vb 4                      | na                                                                |
|         | TRBV27       | TRBV27-01*01 | TRBD01-01*01 | TRBJ01-05*01 | 86                 | CSVGTANTGELFF                                                                         | ACTGTGAGCAACATGAGCCTGAAGACAGCAGTATCTGTGCCAGTCTGGGGGGTGAAGCAGTAACTTTCGGAGAA             | 0.27                 | Vb 14                     | na                                                                |
| TEN-15  | TRBV27       | TRBV27-01*01 | TRBD02-01*01 | TRBJ02-01*01 | 12643              | CASSLAGLGEQFF                                                                         | CTGGAGTCCGCGCAGCAACCAAGCAGCTCTGTACTTGTGCCAGCAGTGTGGGGGGTGGTGGGAGTCTTCGGGGCCA           | 41.71                | Vb 14                     | 27.2                                                              |
|         | TRBV18       | TRBV18-01*01 | TRBD01-01*01 | TRBJ01-05*01 | 3635               | CASSGRRDQYF                                                                           | AGGATCAGCAGCTAGTGCAGGAGATTCGCGAGCTTACTTGTGCCAGCAGTCTTCGGGGGGTGGGAGTCAACCTTCGGTTCG      | 11.99                | Vb 18                     | 0.65                                                              |
|         | TRBV06       | TRBV06-05*01 | unknown      | TRBJ02-03*01 | 3463               | CASSPSSDQYF                                                                           | AGGCTGTCTGGCTGCTCCCTCCAGACATCTGTACTTGTGCCAGCAGTCTTCGGGGGGTGGGAGTCAACCTTCGGTTCG         | 11.43                | Vb 13.1                   | 16.4                                                              |
|         | TRBV20       | TRBV20-01*01 | TRBD02-01    | TRBJ01-02*01 | 1893               | CASLPGYGYTF                                                                           | ACTCTGACAGTGCAGTCCCTCCTGAAGCAGCAGCTTCTACTTGTGCCAGTCTTCGGGGGGTGGGAGTCAACCTTCGGTTCG      | 6.25                 | Vb 2                      | 4.72                                                              |
| TRBV20  | TRBV20-02    | TRBD01-01*01 | TRBJ01-05*01 | 648          | CSAGRRDRDQPHF      | ACAGTGCAGGAGTCCCTCCTGAAGCAGCAGCTTCTACTTGTGCCAGCAGGAGGAGGAGTCAACCTTCGGTTCG             | 1.40                                                                                   | Vb 2                 | 4.72                      |                                                                   |
| TEN-16  | TRBV09       | TRBV09-01    | TRBD01-01*01 | TRBJ01-02*01 | 648                | CASSGRTASYGYTF                                                                        | CTGAGCTCTGTGGAGTGGGGGACTCAGCTTGTATTTCTGTGCCAGCAGGCGGAGCAGCAAGTATGGTCAACCTTCGGTTCG      | 5.23                 | Vb 1                      | na                                                                |
|         | TRBV10       | TRBV10-03*01 | TRBD01-01*01 | TRBJ01-05*01 | 422                | CAISGTDSNPQHF                                                                         | CTGGAGTCCGCTCAGCCTCCCAAGCAGTCTGTACTTGTGCCAGCAGGAGGAGTGAACACTCAGCCCAAGCAGTTCGGTTCG      | 3.41                 | Vb 12                     | na                                                                |
|         | TRBV29       | TRBV29-01*01 | TRBD02-01*02 | TRBJ02-01*01 | 213                | CSATYLAGHNEQFF                                                                        | AGCAACATGAGCCTGAAGCAGCAGCATATATCTGTGCCAGCAGTAAATTTAGCGGGAGTTCACAAATGAGCAGTCTTCGGGGCCA  | 1.82                 | Vb 4                      | na                                                                |
|         | TRBV12       | TRBV12       | TRBD01-01*01 | TRBJ01-01*01 | 100                | CASSPNDGQDEAFF                                                                        | CAGCCCTCAAGAACCCAGGACTCAGCTGTACTTGTGCCAGCAGTCCGAATGACGAGCAGGGGGAGTGAAGCTTCTTCGGAGAA    | 0.71                 | Vb 8                      | na                                                                |
| TRBV30  | TRBV30-01    | TRBD01-01*01 | TRBJ01-02*01 | 87           | CAWMLISEKRYLNYGYTF | AGTACTTGGCTTCTACTTGTGCCAGTGGCTCAATTCGAGAAATACAGGGGGCTTCAATGCTACACCTTCGGTTCG           | 0.70                                                                                   | Vb 20                | na                        |                                                                   |

**Table S5: Productive frequency of the 5 most common TCR- $\beta$  clonotypes found in blister TEN samples, and comparison to the frequency of respective TCR V $\beta$  chains detected by FACS.**

Genomic DNA extracted from blister TEN samples were used for survey level deep sequencing of the TCR $\beta$  chain, using ImmunoSEQ™ platform. TRBV repertoire data were compared to the frequency of respective TCR V $\beta$ + cells detected among CD3+CD8+ T cells by FACS. Of note, the anti-V $\beta$  mAb nomenclature is distinct from the corresponding TRBV nomenclature. Information for Vb family, TRBV, TRBD, TRBJ, template number, amino acid and CDR3 rearrangement are also provided.

V $\beta$  family: the identified V Gene Family that contributed to a specific rearrangement. TRBV: a concise string identifying the most specific V Gene family, gene or allele identified during annotation. TRBD: a concise string identifying the most specific D Gene family, gene or allele identified during annotation. TRBJ: a concise string identifying the most specific J Gene family, gene or allele identified during annotation. Templates: the total number of templates for a specific rearrangement in the sample. CDR3 rearrangement: a particular nucleotide sequence generated through V(D)J recombination. Only productive rearrangements are shown. Productive rearrangements are in-frame, do not contain a stop codon and can produce a functional protein receptor. Productive frequency: the frequency of a specific « productive rearrangement » among all productive rearrangements within a sample, calculated as the templates for a specific rearrangement divided by the sum of productive templates for a sample.

| Patient | Locus | Sorting Strategy             | V family | TRAV/TRBV    | TRAJ/TRBJ    | Templates | Amino-acid        | CDR3 rearrangement                                                                       | Productive Frequency |
|---------|-------|------------------------------|----------|--------------|--------------|-----------|-------------------|------------------------------------------------------------------------------------------|----------------------|
| TEN-9   | TRA   | BLISTERS<br>-<br>CD8+Vβ22+   | TRAV19   | TRAV19-01*01 | TRAJ30-01*01 | 1022      | CALSVVMNRDDKIIF   | CTCACAAAGTCGTGGACTCAGCAGTATACTTCTGTGCTCTGAGTGTGTATATGAACAGAGATGACAAGATCATCTTTGGAAAA      | 51,93                |
|         |       |                              | TRAV19   | TRAV19-01*01 | TRAJ29-01*01 | 951       | CALSEAWGNTPLVF    | AGCCTCACAAAGTCGTGGACTCAGCAGTATACTTCTGTGCTCTGAGTGAGGCGTGGGGAAACACACCTCTTGTCTTTGGAAAG      | 47,88                |
|         |       |                              | TRAV16   | TRAV12-02    | TRAJ54-01*01 | 2         | CALRGAAGNKLTF     | ATTTGCTCAAGAGGAAGACTCAGCCATGATTACTGTGCTCTAAGGGCCCCGCTGCAGGCAACAAGCTAACCTTTGGAGGA         | 0,08                 |
|         |       |                              | TRAV12   | TRAV17-01*01 | TRAJ06-01*01 | 1         | CAVTSQGAQKLVF     | CAGAGACTCCCAGCCAGTATTAGCCACCTACCTCTGTGCCGTGACTAGCCAGGGAGCCAGAAAGCTGTTATTTGGCCAA          | 0,05                 |
|         |       |                              | TRAV17   | TRAV16-01*01 | TRAJ17-01*01 | 1         | CATDAGAGGSYPTF    | TTCCGGGAGCAGACACTGCTTCTTACTTCTGTGCTACGGACGCGGGGAGGAGGAAAGCTACATACCTACATTTGGAAAG          | 0,03                 |
| TEN-9   | TRA   | BLISTERS<br>-<br>CD8+Vβ13.2+ | TRAV19   | TRAV19-01*01 | TRAJ30-01*01 | 128       | CALSVVMNRDDKIIF   | CTCACAAAGTCGTGGACTCAGCAGTATACTTCTGTGCTCTGAGTGTGTATATGAACAGAGATGACAAGATCATCTTTGGAAAA      | 49,41                |
|         |       |                              | TRAV19   | TRAV19-01*01 | TRAJ29-01*01 | 112       | CALSEAWGNTPLVF    | AGCCTCACAAAGTCGTGGACTCAGCAGTATACTTCTGTGCTCTGAGTGAGGCGTGGGGAAACACACCTCTTGTCTTTGGAAAG      | 42,88                |
|         |       |                              | TRAV26   | TRAV26-02    | TRAJ34-01*01 | 4         | CILLNTDKLIF       | GATCCTGCACCGTGTACTTGTGAGAGATGCTGTGTACTACTGCTCTCTCAACACCCGCAAGCTCATCTTTGGGACT             | 1,7                  |
|         |       |                              | TRAV17   | TRAV17-01*01 | TRAJ06-01*01 | 3         | CATDAGAGGSYPTF    | TTCCGGGAGCAGACACTGCTTCTTACTTCTGTGCTACGGACGCGGGGAGGAGGAAAGCTACATACCTACATTTGGAAAG          | 1,25                 |
|         |       |                              | TRAV19   | TRAV19-01*01 | TRAJ54-01*01 | 2         | CALRPVTPQGAQKLVF  | ACAAGTCGTGGACTCAGCAGTATACTTCTGTGCTCTGCGCCCGTTACCCTCAGGGAGCCAGAAGCTGGTATTTGGCCAA          | 0,57                 |
| TEN-9   | TRB   | BLISTERS<br>-<br>CD8+Vβ22+   | TRBV02   | TRBV02-01*01 | TRBJ01-05*01 | 136       | CASSDVGRSNQPQHF   | TCCACAAAGTCGGAGGACTCAGCCATGACTTCTGTGCCAGCAGTGTATGTTGGGGAGAACTAGCAATCAGCCCCAGCATTTTGGTGAT | 56,43                |
|         |       |                              | TRBV06   | TRBV06       | TRBJ01-01*01 | 77        | CASSYSDPRDMNTEAFF | GCTGCTCCCTCCCAACATCTGTGACTTCTGTGCCAGCAGTACTCCGATCCGAGGGACATGAACACTGAAGCTTTCTTTGGACAA     | 31,9                 |
|         |       |                              | TRBV03   | TRBV03       | TRBJ02-02*01 | 1         | CASSTRRSGLTGELFF  | TCCTGGAGCTTGGTACTCTGCTGTGATTTCTGTGCCAGCAGCAGAGACTTACGGCTTACCGGGGAGCTGTTTTTGGAGAA         | 0,0041               |
|         |       |                              | TRBV09   | TRBV09-01    | TRBJ01-04*01 | 1         | CASSPRQATNEKLVF   | AGCTCTCGGAGCTGGGGACTCAGCTTGTATTCTGTGCCAGCAGCCGAGACAGGCAACTAATGAAAACTGTTTTTGGCAGT         | 0,0041               |
|         |       |                              | TRBV25   | TRBV25-01*01 | TRBJ02-06*01 | 1         | CASSYTGQSRANLVTF  | TCTGCCAGGCCCTCACATACCTCTCAGTACTCTGTGCCAGCAGTTACACGGGCAAAAGTCCGGCCCAACGTCCTGACTTCCGGGGCC  | 0,0041               |
| TEN-9   | TRB   | BLISTERS<br>-<br>CD8+Vβ13.2+ | TRBV02   | TRBV02-01*01 | TRBJ01-05*01 | 1231      | CASSDVGRSNQPQHF   | TCCACAAAGTCGGAGGACTCAGCCATGACTTCTGTGCCAGCAGTGTATGTTGGGGAGAACTAGCAATCAGCCCCAGCATTTTGGTGAT | 59,4                 |
|         |       |                              | TRBV06   | TRBV06       | TRBJ01-01*01 | 810       | CASSYSDPRDMNTEAFF | GCTGCTCCCTCCCAACATCTGTGACTTCTGTGCCAGCAGTACTCCGATCCGAGGGACATGAACACTGAAGCTTTCTTTGGACAA     | 39,1                 |
|         |       |                              | TRBV02   | TRBV02-01*01 | TRBJ01-05*01 | 2         | CASSDVGRSNQPQHF   | GTCCACAAGTCGGAGGACTCAGCCATGACTTCTGTGCCAGCAGTGTATGTTGGGGAGAACTAGCAATCAGCCCCAGCATTTTGGTGAT | 9,65E-04             |
|         |       |                              | TRBV06   | TRBV06       | TRBJ01-01*01 | 2         | CASSYSDPRDMNTEAFF | GGCTGCTCCCTCCCAACATCTGTGACTTCTGTGCCAGCAGTACTCCGATCCGAGGGACATGAACACTGAAGCTTTCTTTGGACAA    | 9,65E-04             |
|         |       |                              | TRBV22   | TRBV22-01*01 | TRBJ01-02*01 | 2         | CPGRALGKRRTYGYTF  | TTGGCCACACCAAGCCAAACAGCTTTGACTTCTGTCTGGGAGGGCCCTCGGAAAGCGAAAGACCTATGGCTACACCTTCGGTTCG    | 9,65E-04             |

**Table S6. The two dominant TCRVβ cells isolated from TEN-9 blisters represent a single clone, which has rearranged 2 functional TRBV genes, as well as 2 functional TRAV genes.**

Dominant CD8+TCRVβ13.2+ and CD8+TCRVβ22+ cells were isolated from blister cells of patient TEN-9. Genomic DNA was extracted and used for survey level deep sequencing of the TCRα-chain and TCRβ-chain, using ImmunoSEQ™ platform. Information for Vβ/Vα family, TRB/AV, TRB/AD, TRB/AJ, amino acid and CDR3 rearrangement and productive frequency are provided.

CD8+TCRVβ13.2+ and CD8+TCRVβ22+ cells (expressed at similar percentages in skin lesions (**Figure 3**)) were associated with the same pair of overexpressed Vα chains (TCRVA19-01\*01) but with distinct TRAJ segments (respectively TRAJ30-01\*01 and TRAJ29-01\*01). In parallel to the 2 TRAV genes, 2 functional TRBV genes (TRBV02-01\*01 and TRBV06) were also detected, indicating that CD8+TCRVβ13.2+ and CD8+TCRVβ22+ cells were derived from the same unusual T cell clone.



| Patient | V family | TRBV         | TRBD         | TRBJ         | Templates | Amino-acid         | CDR3 rearrangement                                                                    | Productive frequency | Respective anti-Vβ mAb | % Vβ+ cells among CD3+CD8+ T cells as determined by FACs analysis |
|---------|----------|--------------|--------------|--------------|-----------|--------------------|---------------------------------------------------------------------------------------|----------------------|------------------------|-------------------------------------------------------------------|
| MPE-1   | TRBV05   | TRBV05-06*01 | unresolved   | TRBJ01-01*01 | 499       | CASSWVQLMNTAEFF    | AACGCTCTGTGCTGGGGGACTCGGCCCTCTATCTGTGCCAGCAGTGGGTCCAGTAAATGAACACTGAAGCTTTCTTGGACAA    | 3.65                 | Vb 1                   | na                                                                |
|         | TRBV04   | TRBV04-01*01 | unresolved   | TRBJ01-02*01 | 404       | CASSQDRSYGYVTF     | CACGCCCTGACGCCAGAAAGACTCAGCCTGTATCTGTGCCAGCAGCAAGATCGGGGAGTACTATGGCTACACCTTCGGTTCG    | 0.23                 | Vb 13.6                | na                                                                |
|         | TRBV03   | unresolved   | TRBD01-01*01 | TRBJ01-04*01 | 253       | CASSLQSGQINEKLF    | TCCTGGAGCTTGGTACTCTGCTGTATTTCTGTGCCAGCAGCAATATCTGTGCAGATTAAATGAAAACTGTTTTTGGCAGT      | 0.17                 | Vb 22                  | na                                                                |
|         | TRBV07   | TRBV07-06*01 | TRBD01-01*01 | TRBJ02-02*01 | 246       | CASSLVQAGALYFF     | ATCCAGCCACAGAGCAGCGGGACTCGGCCATGTATGCTGTGCCAGCAGCTTAGTACAGGGGGCCGGGGAGCTGTTTTGGAGAA   | 0.15                 | Vb 13.1                | na                                                                |
|         | TRBV09   | TRBV09-01    | TRBD01-01*01 | TRBJ02-07*01 | 232       | CASSVGHSTSYEQYF    | AGCTCTGTGAGCTGGGGGACTCAGCTTGTATTTCTGTGCCAGCAGCTAGGGCCAGCACCTCTACAGCAGACTCTCGGGCCG     | 0.15                 | Vb 13.1                | na                                                                |
| MPE-2   | TRBV27   | TRBV27-01*01 | TRBD02-01    | TRBJ01-06*01 | 660       | CASPAGDYNSPLHF     | GAGTCGCCACGCCCAACAGCAGCTCTGTACTCTGTGCCAGCAGCCCGGGGGGACTAATACCCCTCCACTTTGGGAAC         | 0.39                 | Vb 14                  | na                                                                |
|         | TRBV04   | TRBV04-03*01 | TRBD01-01*01 | TRBJ02-02*01 | 654       | CASSPTRGYAGELFF    | CACACCCTGCAGCCAGAAGACTCGGCCCTGTATCTGTGCCAGCAGCCCGAGGGGATATGCCGGGGAGCTGTTTTGGAGAA      | 0.38                 | Vb 7.2                 | na                                                                |
|         | TRBV11   | TRBV11-02*02 | TRBD01-01*01 | TRBJ01-02*01 | 452       | CASSTAGTYGAYTF     | ATCCAGCCTGCAAAAGTTGAGGACTCGGCCGTGTATCTGTGCCAGCAGCAGCGGGGACAGGGTATGGCTACACCTTCGGTTCG   | 0.27                 | Vb 21.3                | na                                                                |
|         | TRBV03   | unresolved   | TRBD01-01*01 | TRBJ01-02*01 | 399       | CASSQGLKVQATNYGYTF | GAGCTTGGTACTCTGCTGTATTTCTGTGCCAGCAGCAAGTTTAAAGTAGGGGAACTAAGTATGGCTACACCTTCGGTTCG      | 0.23                 | unknown                | na                                                                |
|         | TRBV02   | TRBV02-01*01 | TRBD02-01*01 | TRBJ01-02*01 | 334       | CASSEARSGYGYTF     | ATCCGGTCCAAAGCTGGAGGACTCAGCCATGACTCTGTGCCAGCAGTGAAGCGGGGGAAGCTATGGCTACACCTTCGGTTCG    | 0.20                 | Vb 22                  | na                                                                |
| MPE-3   | TRBV05   | TRBV05-04*01 | TRBD01-01*01 | TRBJ01-02*01 | 547       | CASSLQWADYGYTF     | GTGAACGCTTGGAGCTGGAGCAGCTCGGCCCTGTATCTGTGCCAGCAGCTTGGGGTGGCTGACTATGGCTACACCTTCGGTTCG  | 1.48                 | unknown                | na                                                                |
|         | TRBV04   | TRBV04-01*01 | unknown      | TRBJ01-02*01 | 334       | CASSRSPAPNYGYTF    | CACGCCCTGACGCCAGAGACTCAGCCTGTATCTGTGCCAGCAGCTAGAGCGGGCCCTAAGCTATGGCTACACCTTCGGTTCG    | 0.90                 | Vb 7.1                 | 6.36                                                              |
|         | TRBV07   | TRBV07-02*01 | TRBD02-01    | TRBJ01-02*01 | 175       | CASSLSLYGTF        | ACTCTGAGCATCAAGCCACAGCAGGAGACTCGGCCGTGTATCTGTGCCAGCAGCTTAAAGCTTGGCTACACCTTCGGTTCG     | 0.47                 | unknown                | na                                                                |
|         | TRBV07   | TRBV07-09    | TRBD01-01*01 | TRBJ01-02*01 | 137       | CASSPQGARIGYGYTF   | ACAGAGAGGGGGACTCGGCCATGTATCTGTGCCAGCAGCCACACAGGGGGCCGGGGGATCTATGGCTACACCTTCGGTTCG     | 0.37                 | unknown                | na                                                                |
|         | TRBV20   | TRBV20       | unknown      | TRBJ02-02*01 | 136       | CSARRQNTGELFF      | GTGACAGTGGCCATCTGAAGCAGCAGCTTACATCTGCAGTGTAGACCGGGCAGAACCCGGGGAGCTTTTTGGAGAA          | 0.37                 | unknown                | na                                                                |
| MPE-4   | TRBV24   | TRBV24       | unknown      | TRBJ02-04*01 | 106       | CATSGPMLIANKIQYF   | TCTGCCATCCCCAACAGCAGCTCTTACTTCTGTGCCAGCAGTGGCCCAATGTTAAGCCAAACACTTCACTTCGGGCC         | 1.84                 | unknown                | na                                                                |
|         | TRBV30   | TRBV30-01*01 | unknown      | TRBJ01-01*01 | 90        | CAWSVLRRDPDAFF     | TCTAAGAGCTCTTCTCAGTACTGCTGGCTCTATCTGTGCCAGCAGTGTAGCAGCAGCAGCTGATGCTTTCTTGGACAA        | 1.56                 | Vb 20                  | 6.07                                                              |
|         | TRBV09   | TRBV09-01    | unknown      | TRBJ01-01*01 | 89        | CASSEWTVSEAFF      | AACTGAGCTCTGGAGCTGGGGGACTCAAGCTTGTATTTCTGTGCCAGCAGCAGTGGAGTGAAGGAGCTTTCTTGGACAA       | 1.54                 | Vb 1                   | 12.5                                                              |
|         | TRBV05   | TRBV05-04*01 | TRBD02-01    | TRBJ02-03*01 | 77        | CASSPQGLAIPGDYQYF  | TTGGAGCTGAGCAGCTCGGCCCTGTATCTGTGCCAGCAGCCCGGGGCTAGGCTACAGGGGATACGAGTATTTGGCCCA        | 1.33                 | unknown                | na                                                                |
|         | TRBV19   | TRBV19-01    | TRBD02-01    | TRBJ02-07*01 | 57        | CATHASSYEQYF       | ACTGTGACATCGGCCCAAAAGAACCCGACAGCTTCTATCTGTGCCACCCATGCTCAAGTCTACAGAGCAGTACTTCGGGCCG    | 0.99                 | Vb 17                  | 12.2                                                              |
| MPE-5   | TRBV02   | TRBV02-01*01 | TRBD01-01*01 | TRBJ01-05*01 | 162       | CASSPLRQGIASSNQPHF | CTGGAGGACTCAGCCATGTACTCTGTGCCAGCAGTCCCCTTAGCAGGGCATCGCTTAGCAATCAGCCAGCATTGGGTGAT      | 1.92                 | Vb 22                  | 5.68                                                              |
|         | TRBV19   | TRBV19-01    | TRBD02-01*02 | TRBJ02-03*01 | 73        | CASSIGLAGLTDYQYF   | TCGGCCAAAGAACCCGACAGCTTTCTATCTGTGCCAGTAGTATAGGCTAGCGGACTCAGAGATACGAGTATTTGGCCCA       | 0.86                 | Vb 17                  | 5.07                                                              |
|         | TRBV09   | TRBV09-01    | TRBD02-01    | TRBJ02-01*01 | 71        | CASSVDPPSPGRNEAFF  | CTGGAGCTGGGGGACTCAGCTTTGTATTTCTGTGCCAGCAGCTAGTACAGGGCTAGCGGGGCTAATGAGCAGTCTTCGGGCCA   | 0.84                 | Vb 1                   | 2.1                                                               |
|         | TRBV07   | TRBV07-06*01 | TRBD02-01    | TRBJ01-02*01 | 69        | CASSLGEYGYTF       | ACGATCAGCGCAGAGCAGCGGGGACTCGGCCATGTATCGCTGTGCCAGCAGCTTAGCGGAGTACTATGGCTACACCTTCGGTTCG | 0.82                 | unknown                | na                                                                |
|         | TRBV02   | TRBV02-01*01 | unknown      | TRBJ01-03*01 | 64        | CASSPMGISGNITYF    | CGGTCCAAAGCTGGAGGACTCAGCCATGACTCTGTGCCAGCAGTCCCATGGGATCTCTGAAAACACCATATATTTGGAGAG     | 0.76                 | Vb 22                  | 5.68                                                              |
| MPE-6   | TRBV07   | TRBV07-03*01 | TRBD02-01*02 | TRBJ01-03*01 | 771       | CASLTKRAGSGNTIYF   | ACAGAGCGGGGGGACTCAGCCGTGTATCTGTGCCAGCAGCTCCGAAAGCGGGGAGGTTCTGAAAACACCATATATTTGGAGAG   | 18.01                | unknown                | na                                                                |
|         | TRBV28   | TRBV28-01*01 | TRBD01-01*01 | TRBJ01-01*01 | 68        | CASSVFRGTGAETFF    | TCGCAGCACAACCAAGACATCTATGATCTCTGTGCCAGCAGTTCGGTGTTCAGGACAGGGGCCACTGAAGCTTTCTTGGACAA   | 1.59                 | Vb 3                   | na                                                                |
|         | TRBV25   | TRBV25-01*01 | TRBD02-01*01 | TRBJ01-01*01 | 24        | CASLTPRGSNTEAFF    | CTGGAGTCTGCCAGGCCCTCACATACGTCTCAGTACTCTGTGCCAGCAGCAGCGGGGCTGAACACTGAAGCTTTCTTGGACAA   | 0.56                 | Vb 11                  | na                                                                |
|         | TRBV07   | TRBV07-09    | TRBD02-01*02 | TRBJ02-01*01 | 22        | CASSLALLRVDVYNEQYF | GAGCAGGGGGACTCGGCCATGTATCTGTGCCAGCAGCTTAGCTTTCCGGGGGATGTCTACAATGAGCAGTCTTCGGGCCA      | 0.51                 | unknown                | na                                                                |
|         | TRBV09   | TRBV09-01    | TRBD02-01    | TRBJ01-05*01 | 21        | CASSEDGGLNVPQHF    | AGCTCTGTGAGCTGGGGGACTCAGCTTGTATTTCTGTGCCAGCAGCGAGGACGGGGGACTGAATCAGCCCAAGCATTGGTGTAT  | 0.49                 | Vb 1                   | na                                                                |
| MPE-7   | TRBV06   | TRBV06-01*01 | TRBD02-01*01 | TRBJ01-03*01 | 489       | CASSAFLTGSYF       | AGGCTGGAGTGGCTCTCCCTCCAGACATCTGTACTCTGTGCCAGCAGTTCATTTACGGGGTTCATATATTTGGAGAG         | 1.24                 | unknown                | na                                                                |
|         | TRBV03   | TRBV03       | TRBD02-01    | TRBJ02-02*01 | 243       | CASNQGRTRGELFF     | ATCAATCCCTGGAGCTTGGTACTCTGTGTATTTCTGTGCCAGCAACCAAGGACTCGCACGGGGAGCTGTTTTGGAGAA        | 0.62                 | unknown                | na                                                                |
|         | TRBV15   | TRBV15-01*01 | TRBD01-01*01 | TRBJ01-01*01 | 207       | CATSRDRQEAFF       | CTTGACCTCCGCTCACCAGGCTCGGGGACGACGACCTATACCTGTGTGCCAGCAGAGATCGACAGGAACTTTCTTGGACAA     | 0.52                 | unknown                | na                                                                |
|         | TRBV05   | TRBV05-03    | TRBD01-01*01 | TRBJ01-03*01 | 171       | CARRRIRSGNTIYF     | AGTGCTTGGAGCTGGGGGACTCGGCCCTGTATCTGTGCCAGAAAGCAGGGAAATAGGCTGGAAAACCATATATTTGGAGAG     | 0.43                 | unknown                | na                                                                |
|         | TRBV11   | TRBV11-03*01 | TRBD02-01*02 | TRBJ02-07*01 | 132       | CASSLLEAYEQYF      | AAGATCCAGCTGCAGAGCTGGGGACTCGGCCGTATCTGTGCCAGCAGCTAACGGAGGCTCAGAGCAGTACTTCGGGCCG       | 0.33                 | unknown                | na                                                                |

**Table S7: Comparison of the productive frequency of the 5 most common TCR-β clonotypes found in skin MPE samples, and the frequency of respective TCR-Vβ chains detected by FACs.**

Genomic DNA extracted from skin MPE samples was used for survey level deep sequencing of the TCRβ-chain, using ImmunoSEQ™ platform. The TRBV repertoire and TCR-Vβ FACS analysis is described in the footnotes of Table S5.



Genomic DNA extracted from PBMC TEN samples was used for survey level deep sequencing of the TCR $\beta$ -chain, using ImmunoSEQ<sup>TM</sup> platform. The TRBV repertoire and TCR-V $\beta$  FACS analysis is described in the footnotes of Table S5.

| Patient | V family | TRBV         | TRBD         | TRBJ         | Templates | Amino-acid           | CDR3 rearrangement                                                                        | Productive frequency | Respective anti-Vβ mAb | % Vβ+ cells among CD3+CD8+ T cells as determined by FACS analysis |
|---------|----------|--------------|--------------|--------------|-----------|----------------------|-------------------------------------------------------------------------------------------|----------------------|------------------------|-------------------------------------------------------------------|
| MPE-3   | TRBV05   | TRBV05-04*01 | TRBD01-01*01 | TRBJ01-02*01 | 621       | CASSLWADYGYTF        | GTGAACGCTTGGAGCTGGACGACTGGCCCTGTATCTCTGTGCCAGCAGCTTGGGGTGGGCTGACTATGGCTACACCTTCGGTTCG     | 3.33                 | unknown                | na                                                                |
|         | TRBV05   | TRBV05-06*01 | TRBD01-01*01 | TRBJ01-04*01 | 391       | CASSDRYRAEKLF        | GTGAACGCTTGTGCTGGGGGACTGGCCCTATCTCTGTGCCAGCAGCAGATACAGGGCCGAAAACTGTTTTTGGCAGT             | 2.10                 | Vb 5.2                 | 0.81                                                              |
|         | TRBV04   | TRBV04-03*01 | TRBD02-01*02 | TRBJ02-01*01 | 386       | CASSPSGGRLSNEQFF     | CTGCAGCCAGAAAGACTGGCCCTGTATCTCTGTGCCAGCAGCCATCTGGGGAGGGGGGACTCTCCAATGAGCAGTCTTCGGGCCA     | 2.07                 | Vb 7.2                 | 0                                                                 |
|         | TRBV15   | TRBV15-01*01 | TRBD02-01*02 | TRBJ02-05*01 | 377       | CATSRTGRWETQYF       | ATCCGCTCACCAGGCTGGGGGACGACGACCTGTACCTGTGTGCCACCAGCCGACGGGGAGGTGGGAGACCAGTACTTCGGGCCA      | 2.02                 | unknown                | na                                                                |
|         | TRBV11   | TRBV11-02*02 | TRBD01-01*01 | TRBJ02-07*01 | 354       | CASSSRDRGYEQYF       | ATCCAGCCCTCAAAAGCTTGGAGACTCGGCCCTGTATCTCTGTGCCAGCAGCTCCCGGGACAGGGGGCTACGAGCAGTACTTCGGGCCG | 1.90                 | Vb 21.3                | 3.94                                                              |
| MPE-4   | TRBV07   | TRBV07-09    | TRBD01-01*01 | TRBJ01-02*01 | 101       | CASSLAGTGHGYTF       | ATCCAGCCGACAGACGAGGGGACTCGGCCATGTATCTCTGTGCCAGCAGCTTAGCGGGACAGATATGGCTACACCTTCGGTTCG      | 2.10                 | unknown                | na                                                                |
|         | TRBV06   | TRBV06       | TRBD01-01*01 | TRBJ01-02*01 | 59        | CASSPTGSLGYTYF       | TCCGCTGCTCCTCCAGACATGTGTACTGTGTGCCAGCAGTCCCGGACAGGCTCTTGGCTATGGCTACACTTCGGTTCG            | 1.23                 | unknown                | na                                                                |
|         | TRBV07   | TRBV07-09    | unknown      | TRBJ01-03*01 | 51        | CASSLTVLLGNTIYF      | ACAGAGCAGGGGGACTGGCCATGTATCTCTGTGCCAGCAGCTCACTACAGTACTCTCGGGGAAACACCATATATTTGGAGAG        | 1.06                 | unknown                | na                                                                |
|         | TRBV05   | TRBV05-04*01 | TRBD02-01    | TRBJ02-01*01 | 19        | CASSLTGLEQFF         | CTGAATGTGAACGCTTGGAGCTGGAGCAGCTGGCCCTGTATCTCTGTGCCAGCAGCTTGGGGACTTTGGAGCAGTCTTCGGGCCA     | 0.39                 | unknown                | na                                                                |
|         | TRBV07   | TRBV07-02*01 | TRBD02-01*01 | TRBJ01-02*01 | 13        | CASSPTGGGNGYTF       | ATCCAGCCGACACAGCAGGAGACTCGGCCGTGTATCTCTGTGCCAGCAGCCCGGGGGCGGGAAATGGCTACACCTTCGGTTCG       | 0.27                 | unknown                | na                                                                |
| MPE-5   | TRBV04   | TRBV04-01*01 | unknown      | TRBJ02-01*01 | 283       | CASSLIDGEEQFF        | CTTCACTACAGCCCTCGACGCAAGACTCAGCCCTGTATCTCTGTGCCAGCAGCTACTGGACGGAGAGCAGTCTTCGGGCCA         | 3.31                 | Vb 7.1                 | 2.81                                                              |
|         | TRBV10   | TRBV10-03*01 | TRBD01-01*01 | TRBJ02-07*01 | 281       | CAISEGGAGTGSSEQYF    | TCCGCTACAGCTCCCGAAGCATCTGTGTACTCTGTGCCATCAGTGAGGGGGGCGCGGACAGGCTCCGAGCAGTACTTCGGGCCG      | 3.28                 | Vb 12                  | 7.74                                                              |
|         | TRBV20   | TRBV20       | TRBD02-01*02 | TRBJ02-01*01 | 155       | CSARDLELVGWNQYF      | ACCAGTGGCCATCCTGAAGACAGCAGCTTCACTCTGTGCCAGCTAGAGATCTCAGGATTTGGGTGAATGAGCAGTCTTCGGGCCA     | 1.81                 | unknown                | na                                                                |
|         | TRBV07   | TRBV07-09    | unknown      | TRBJ01-01*01 | 127       | CASVPLSGNTEAFF       | ATCCAGCCGACAGAGCAGGGGACTCGGCCATGTATCTCTGTGCCAGCAGCTCCCTGTGCCGCAACACTGAGCAGTCTTCGGGACAA    | 1.48                 | unknown                | na                                                                |
|         | TRBV07   | TRBV07-02*01 | TRBD01-01*01 | TRBJ02-07*01 | 68        | CATRPGPTRPSPSYEQYF   | CAGCAGGAGGACTCGGCCGTGTATCTCTGTGCCAGCAGCCCGGGCCGACGAGGGGGCGGAGCTCTACGAGCAGTACTTCGGGCCG     | 0.79                 | unknown                | na                                                                |
| MPE-6   | TRBV03   | TRBV03       | TRBD02-01    | TRBJ02-01*01 | 447       | CASRGSYSNEQFF        | ATCAATCCCTGGAGCTTGGTACTCTGTGTATTTCTGTGCCAGCAGGGGGAGCGCTCTACAATGAGCAGTCTTCGGGCCA           | 0.68                 | unknown                | na                                                                |
|         | TRBV28   | TRBV28-01*01 | TRBD01-01*01 | TRBJ01-01*01 | 410       | CASSVFRGTGATEAFF     | TCCGCGACCAACAGACATCTGTACTCTGTGCCAGCAGTTCGGTGTTCAGGACAGGGGCCACTGAAGCTTCTTCGGGCCA           | 0.63                 | Vb 3                   | na                                                                |
|         | TRBV07   | TRBV07-09    | TRBD01-01*01 | TRBJ01-04*01 | 75        | CASSPASGTEGKLF       | CGCAGAGCAGGGGGACTCGCCATGTATCTCTGTGCCAGCAGCCCGCTCCGGACAGAGGGTGA AAAACTGTTTTGGCAGT          | 0.11                 | unknown                | na                                                                |
|         | TRBV28   | TRBV28-01*01 | TRBD02-01*02 | TRBJ02-07*01 | 74        | CASSLGGVAYEQYF       | CTGAGTCCGACAGCAACAGACATCTATCTACTCTGTGCCAGCAGTTAGGAGGGTGGCTCAGCAGCAGTACTTCGGGCCG           | 0.11                 | Vb 3                   | na                                                                |
|         | TRBV05   | TRBV05-01*01 | TRBD01-01*01 | TRBJ01-02*01 | 64        | CASSRTGYVGYTF        | AATGTGAGCACCTTGGAGCTGGGGGACTCGGCCCTTATCTTTCGGCCAGCAGCCGGACAGGCTATTATGGCTACACCTTCGGTTCG    | 0.10                 | Vb 5.1                 | na                                                                |
| MPE-7   | TRBV30   | TRBV30-01*01 | unknown      | TRBJ01-01*01 | 249       | CAWSLENTEAFF         | CTGAGTCTAAGAAGCTCCTCTCAGTACTTGGCTTCTATCTCTGTGCCAGTGGAGTTGGAGAACACTGAAGCTTCTTCGGGCCA       | 0.98                 | Vb 20                  | 6.42                                                              |
|         | TRBV03   | TRBV03       | unknown      | TRBJ01-06*01 | 140       | CASSSGNGNSPLHF       | ATCAATCCCTGGAGCTTGGTACTCTGTGTATTTCTGTGCCAGCAGCTCCGGCAATGGGAATTCACCCCTCCACTTCGGGAAAC       | 0.55                 | unknown                | na                                                                |
|         | TRBV09   | TRBV09-01    | TRBD01-01*01 | TRBJ02-02*01 | 125       | CASSRRRRRAGNPNTGELFF | CTGGGGGACTCAGCTTTGATTTCTGTGTGCCAGCAGCCCGAAGAGCTGACGGGAATCCGAACCCGGGGAGCTGTTTTGGAGAA       | 0.49                 | Vb 1                   | 2.72                                                              |
|         | TRBV12   | TRBV12       | TRBD01-01*01 | TRBJ02-07*01 | 121       | CASSFGTNYEQYF        | ATCCAGCCCTCAGAAACCAGGGACTCAGCTGTGTATCTCTGTGCCAGCAGTTTGGTGGGACAAATTCAGAGCAGTACTTCGGGCCG    | 0.48                 | unknown                | na                                                                |
|         | TRBV15   | TRBV15-01*01 | TRBD01-01*01 | TRBJ01-01*01 | 99        | CATSRDRQEAFF         | CTTGACTCCCTCACCAGCCCTGGGGGAGCGAGCAGTACTGTGTGCCAGCAGCAGATGACAGGAAAGCTTCTTCGGGACAA          | 0.39                 | unknown                | na                                                                |

**Table S9: Comparison of the productive frequency of the 5 most common TCR-β clonotypes found in PBMC MPE samples, and the frequency of respective TCR-Vβ chains detected by FACS.**

Genomic DNA extracted from PBMC MPE samples were used for survey level deep sequencing of the TCRβ-chain, using ImmunoSEQ™ platform. The TRBV repertoire and TCR-Vβ FACS analysis is described in the footnotes of Table S5.

| Patient | Sorted Vβ | V family | TRAV         | TRAJ         | Templates | Amino-acid          | CDR3 rearrangement                                                                 | Productive Frequency |
|---------|-----------|----------|--------------|--------------|-----------|---------------------|------------------------------------------------------------------------------------|----------------------|
| TEN-3   | Vβ21.3    | TRAV25   | TRAV25-01*01 | TRAJ43-01*01 | 13167     | CANNMRF             | CAGCTCCCTGCACATCACAGCCACCCAGACTACAGATGTAGGAACCTACTTCTGTGCCAACAATGACATGCGCTTTGGAGCA | 87.6                 |
|         |           | TRAV25   | TRAV25-01*01 | TRAJ43-01*01 | 1309      | CANNMRF             | CAGTTCCTGCACATCACAGCCACCCAGACTACAGATGTAGGAACCTACTTCTGTGCCAACAATGACATGCGCTTTGGAGCA  | 8.5                  |
|         |           | TRAV19   | TRAV19-01*01 | TRAJ17-01*01 | 55        | CALSEAHPRGKAAGNKLTF | GGACTCAGCAGTATACTTCTGTGCTCTGAGTGAGGCGCATCCCCGGTAAAGCTCAGGCAACAAGCTAACTTTGGAGGA     | 0.4                  |
|         |           | TRAV39   | TRAV39-01*01 | TRAJ27-01*01 | 32        | CAVVRPNAGKSTF       | CACAGCTGCCGTGCATGACCTCTCTGCCACCTACTCTGTGCCGTGGTGCAGCCCAATGCAGGCAAAATCAACCTTTGGGGAT | 0.1                  |
|         |           | TRAV20   | TRAV20-01    | TRAJ42-01*01 | 10        | CAVQVLYGGSQNLIF     | TAAACCTGAAGACTCAGCCACTTATCTGTGCTGTGCAGTCTTATATGGAGGAAGCCAAAGGAAATCTCATCTTTGGAAAA   | 0.07                 |
| TEN-7   | Vβ13.2    | TRAV13   | TRAV13-01    | TRAJ39-01*01 | 284       | CADNAGNMLTF         | GCACATCACAGAGACCCAACCTGAAGACTCGGCTGTACTTCTGTGCCGATAATGCAGGCAACATGCTCACCTTTGGAGGG   | 86.95                |
|         |           | TRAV14   | TRAV14-01    | TRAJ53-01*01 | 24        | CAMREGQSGGSNYKLTF   | ACTGGGGGACTCAGCAATGATTTCTGTGCAATGAGAGAGGGCCAGAGTGGAGGTAGCAACTATAAACTGACATTTGGAAAA  | 7.52                 |
|         |           | TRAV29   | TRAV29-01    | TRAJ52-01*01 | 4         | CAANSYGVKLF         | CATTGTGCCCTCCAGCCTGGAGACTCTGCAGTGTACTTCTGTGCAGCAAATAGCGGCTATGGAAAAGCTGACATTTGGACAA | 1.62                 |
|         |           | TRAV39   | TRAV39-01*01 | TRAJ45-01*01 | 2         | CAVPPGGADGLTF       | AGCTGCCGTGCATGACCTCTGCCACCTACTTCTGTGCCGTCCCCCAGGAGGAGGTGCTGACGGACTCACCTTTGGCAA     | 0.93                 |
|         |           | TRAV12   | TRAV12-01    | TRAJ50-01*01 | 2         | CVVLYDKVIF          | CCTGCTCATCAGAGACTCCAAGCTCAGTGATTCAGCCACCTACCTCTGTGTGTTCTCTACGACAAGGTGATATTTGGGCCA  | 0.66                 |
| TEN-10  | Vβ3       | TRAV27   | TRAV27-01*01 | TRAJ26-01*01 | 170295    | CAGDDNYGQNFVF       | CACTGCAGCCCGCTGGTGATACAGGCCTCTACCTCTGTGCAGGGGACGATAACTATGGTCAGAATTTGTCTTTGGTCCC    | 89.84                |
|         |           | TRAV21   | TRAV21-01    | TRAJ20-01*01 | 817       | CAVVRPNKYLSF        | CATTGCAGCTTCTCAGCCTGGTGACTCAGCCACCTACTCTGTGCTGTGAGGCCAAACGACTACAAGCTCAGCTTTGGAGCC  | 0.43                 |
|         |           | TRDV02   | TRDV02-01    | TRDJ01-01*01 | 752       | CACDPVSWETGDQDKLIF  | AGATGAAGGGTCTTACTACTGTGCTGTGCCCTGTTCTTCCGGAGACTGGGGATCAAACCGATAAACTCATCTTTGGAAAA   | 0.39                 |
|         |           | TRAV21   | TRAV21-01    | TRAJ47-01*01 | 544       | CAVKELEYGNKLVF      | AGCTTCTCAGCCTGGTGACTCAGCCACCTACTCTGTGCTGTGAAGGAATTGGAATATGGAACAACCTGGTCTTTGGCGCA   | 0.29                 |
|         |           | TRAV21   | TRAV21-01    | TRAJ49-01*01 | 436       | CAVRPFTGNQFYF       | AGCTTCTCAGCCTGGTGACTCAGCCACCTACTCTGTGCTGTGAGGCCAACTTCCACCGTAACCAAGTTCTATTTGGGACA   | 0.22                 |
| TEN-15  | Vβ14      | TRAV39   | TRAV39-01*01 | TRAJ40-01*01 | 2732      | CAVDIVGYKIF         | CATCACAGCTGCCGTGCATGACCTCTCTGCCACCTACTTCTGTGCCGTGGACATTGTTGGCTACAAATACATCTTTGGAAAC | 96.08                |
|         |           | TRAV24   | TRAV24-01*01 | TRAJ22-01*01 | 32        | CASLSGSARQLTF       | CAAAGGATCCAGCCTGAAGACTCAGCCACATACCTCTGTGCTCTCTTTCTGTTCTGCAAGGCAACTGACCTTTGGATCT    | 1.23                 |
|         |           | TRAV12   | TRAV12-01    | TRAJ41-01*01 | 11        | CVVRDSGYALNF        | CATCAGAGACTCCAAGCTCAGTGATTCAGCCACCTACTCTGTGTTGGTGAGGGATTCCGGGTATGCACTCAACTTCGGCAAA | 0.42                 |
|         |           | TRAV26   | TRAV26-01    | TRAJ37-01    | 9         | CIGGFRVCTQL         | GATCTGCCCCAGCTACGCTGAGAGACACTGCTGTACTATTGCATCGGCGGATCCGGGTATGCACTCAACTTCGGCAA      | 0.38                 |
|         |           | TRAV19   | TRAV19-01*01 | TRAJ18-01*01 | 6         | CAPDRGSLGRLYF       | AGCCTCACAAGTCGTGGACTCAGCAGTACTTCTGTGCTCCGCAGAGGCTCAACCTGGGGAGGCTACTTTGGAAGA        | 0.19                 |

**Table S10: Identification of the main TCR-α chains expressed by dominant TCR-Vβ+ cells.**

Dominant CD8+TCR-Vβ+ cells were FACS sorted from the blister or PBMC samples of patients TEN-3, -7, -10 and -15. Genomic DNA was extracted and used for survey level deep sequencing of the TCRα-chain, using ImmunoSEQ™ platform. Information for Vα family, TRAV, TRAJ, template number, amino acid and CDR3 rearrangement and productive frequency are provided, as described in Table S5.

| Patient | Sorted V $\beta$ | V family | TRAV         | TRAJ         | Templates | CDR3 rearrangement                                                                 | Unproductive TCR $\alpha$ chain Frequency |
|---------|------------------|----------|--------------|--------------|-----------|------------------------------------------------------------------------------------|-------------------------------------------|
| TEN-3   | V $\beta$ 21.3   | TRAV23   | TRAV23-01    | TRAJ37-01    | 14520     | AAGCAGTTCTCATTGCATATCATGGATTCCCAGCCTGGAGACTCAGCCACCTAGGAACACAGGCAAATAATCTTTGGGCAA  | 47                                        |
|         |                  | TRAV23   | TRAV23-01    | TRAJ37-01    | 164       | AAGCACCTCTCATTGCATATCATGGATTCCCAGCCTGGAGACTCAGCCACCTAGGAACACAGGCAAATAATCTTTGGGCAA  | 0.6                                       |
| TEN-7   | V $\beta$ 13.2   | TRAV35   | TRAV35-01    | TRAJ27-01*01 | 3         | TTCTGAATATCTCAGCATCCATACCTAGTGATGTAGGCATCTACTTCTGTGCTGGGCAGGGCCAAATCAACCTTTGGGGAT  | 1.2                                       |
|         |                  | TRAV01   | TRAV01-01    | TRAJ30-01*01 | 3         | TTCTACAGGAGCTCCAGATGAAAGACTCTGCCTTACTTCTGCGCTGTGAGAGGGGGCCGGGCAAGATCATCTTTGGAAAA   | 1.1                                       |
| TEN-10  | V $\beta$ 3      | TRAV36   | TRAV36-01    | TRAJ40-01*01 | 94386     | ACAGCCACCCAGACCGGAGACTCGGCCGTCTACCTCTGTGCTGTGGAGTGCCTCAGGAACCTACAAATACATCTTTGGAACA | 31.5                                      |
|         |                  | TRAV25   | TRAV25-01*01 | TRAJ30-01*01 | 672       | ACAGCTCCCTGCACATCACAGCCACCCAGACTACAGATGTAGGAACCTCCTGAACAGAGATGACAAGATCATCTTTGGAAAA | 0.2                                       |
| TEN-15  | V $\beta$ 14     | TRAV27   | TRAV27-01*01 | TRAJ26-01*01 | 170295    | CACTGCAGCCCAGCCTGGTGATACAGGCCTCTACCTCTGTGACAGGGGACGATAACTATGGTCAGAATTTGTCTTTGGTCCC | 50.2                                      |
|         |                  | TRDV02   | TRDV02-01    | TRDJ01-01*01 | 752       | AGATGAAGGGTCTTACTACTGTGCCTGTGACCCGTTTCTGGGAGACTGGGGATCAAACCGATAAATCATCTTTGGAAAA    | 0.4                                       |

**Table S11. Main unproductive TCR- $\alpha$  chains found in dominant TCR-V $\beta$ + cells.**

Dominant CD8+TCR-V $\beta$ + cells from the blister or PBMC samples of patients TEN-3, -7, -10 and -15 were FACS sorted and analysed as described in Table S10. Information for nature and frequency of unproductive TCR- $\alpha$  chains are provided.

|        | Target clone                                                                      | Dominant clonotypes obtained through V $\beta$ sorting |          |              |              | TCR transfectant ID                                                                   |               |
|--------|-----------------------------------------------------------------------------------|--------------------------------------------------------|----------|--------------|--------------|---------------------------------------------------------------------------------------|---------------|
|        |                                                                                   | Chains                                                 | V family | TCR(A/B)V    | TCR(A/B)J    |                                                                                       | Rearrangement |
| TEN-3  | 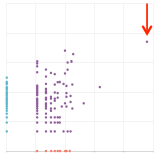 | $\beta$                                                | TRBV11   | TRBV11-02*02 | TRBJ02-01*01 | CAGCCTGCAAAGCTTGAGGACTCGGCCGTGTATCTCTGTGCCAGCAGCCCTCCGTGACTCTACAATGAGCAGTTCTTCGGGCCA  | C1            |
|        |                                                                                   | $\alpha$                                               | TRAV25   | TRAV25-01*01 | TRAJ43-01*01 | CAGCTCCCTGCACATCACAGCCACCCAGACTACAGATGTAGGAACCTACTTCTGTGCCAAATGACATGCGCTTTGGAGCA      |               |
| TEN-7  |  | $\beta$                                                | TRBV06   | TRBV06       | TRBJ02-01*01 | GAGTCGGCTGCTCCCTCCAAACATCTGTGTACTTCTGTGCCAGCAGCCGACTAGCGGGAGTAGTAATGAGCAGTTCTTCGGGCCA | C2            |
|        |                                                                                   | $\alpha$                                               | TRAV13   | TRAV13-01    | TRAJ39-01*01 | GCACATCACAGAGACCAACCTGAAGACTCGGCTGTACTTCTGTGCCGATAATGCAGGCAACATGCTCACCTTTGGAGGG       |               |
| TEN-10 |  | $\beta$                                                | TRBV28   | TRBV28-01*01 | TRBJ01-04*01 | CTGGAGTCGCCAGCACCAACCAGACATCTGTACTCTGTGCCAGCAGTTTCGGGGGCTAATGAAAACTGTTTTTGGCAGT       | C3            |
|        |                                                                                   | $\alpha$                                               | TRAV27   | TRAV27-01*01 | TRAJ26-01*01 | AGCCTCACAAAGTCGTGGACTCAGCAGTACTTCTGTGCTCTGAGTGAGGCGTGGGAAACACACCTTGTCTTTGAAAG         |               |
| TEN-15 |  | $\beta$                                                | TRBV27   | TRBV27-01*01 | TRBJ02-01*01 | CTGGAGTCGCCAGCCCAACAGACCTCTGTACTTCTGTGCCAGCAGCTAGCGGGGGGCTGGGTGAGCAGTTCTTCGGGCCA      | C4            |
|        |                                                                                   | $\alpha$                                               | TRAV39   | TRAV39-01*01 | TRAJ40-01*01 | CATCACAGCTGCCGTGCATGACCTCTGTGCCACTACTTCTGTGCCGTGGACATTGTGGCTACAAAATACATCTTTGGAACA     |               |

**Table S12. Paired TCR $\alpha$  and TCR $\beta$  sequences used to generate Skw3 transductants.**

Table shows minimal information (V $\beta$ /V $\alpha$  family, TRB/AV, TRB/AD, TRB/AJ, CDR3 rearrangement) for the TCR $\alpha$  and TCR $\beta$  chain rearrangement CDR3 sequences that were transduced in Skw3 cells to test drug-specificity of dominant TCR clonotypes from patients TEN-3, -7, -10 and -15. The targeted top clone in paired blister/PBMC heat map scatters is shown, as well as respective transfectant ID.

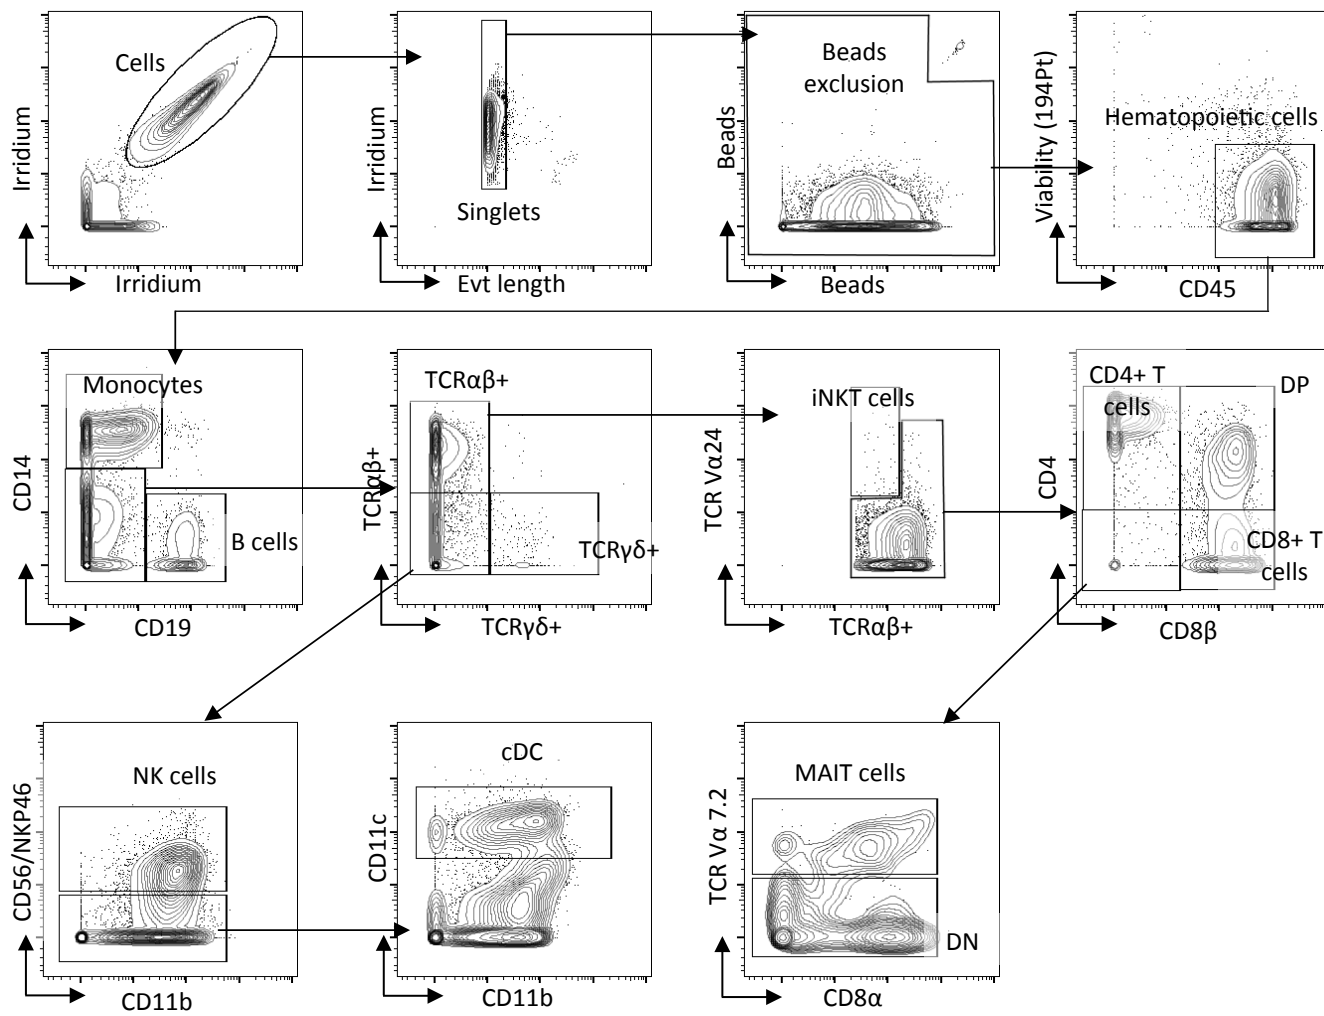

**Figure S1**



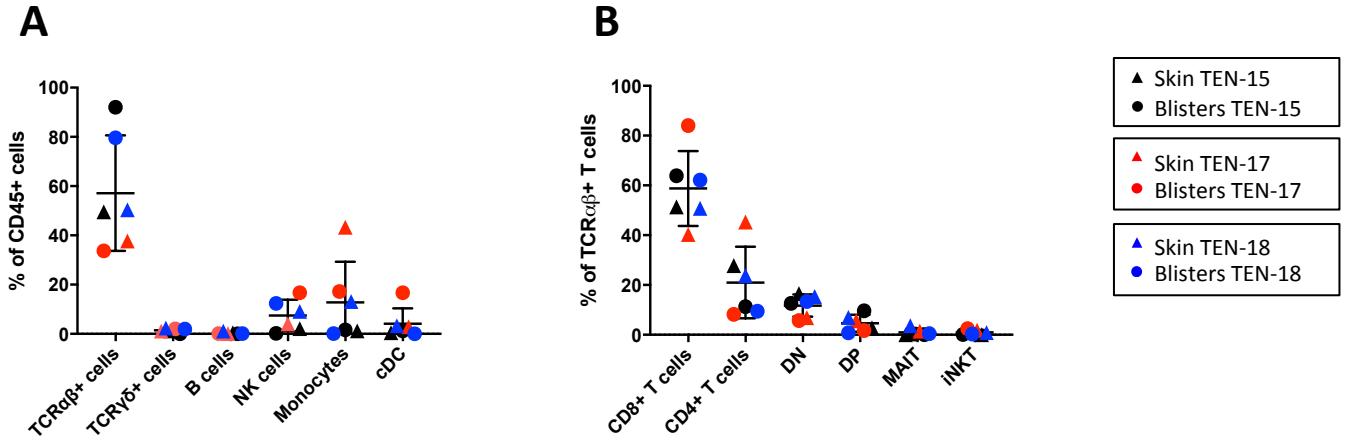

Figure S2

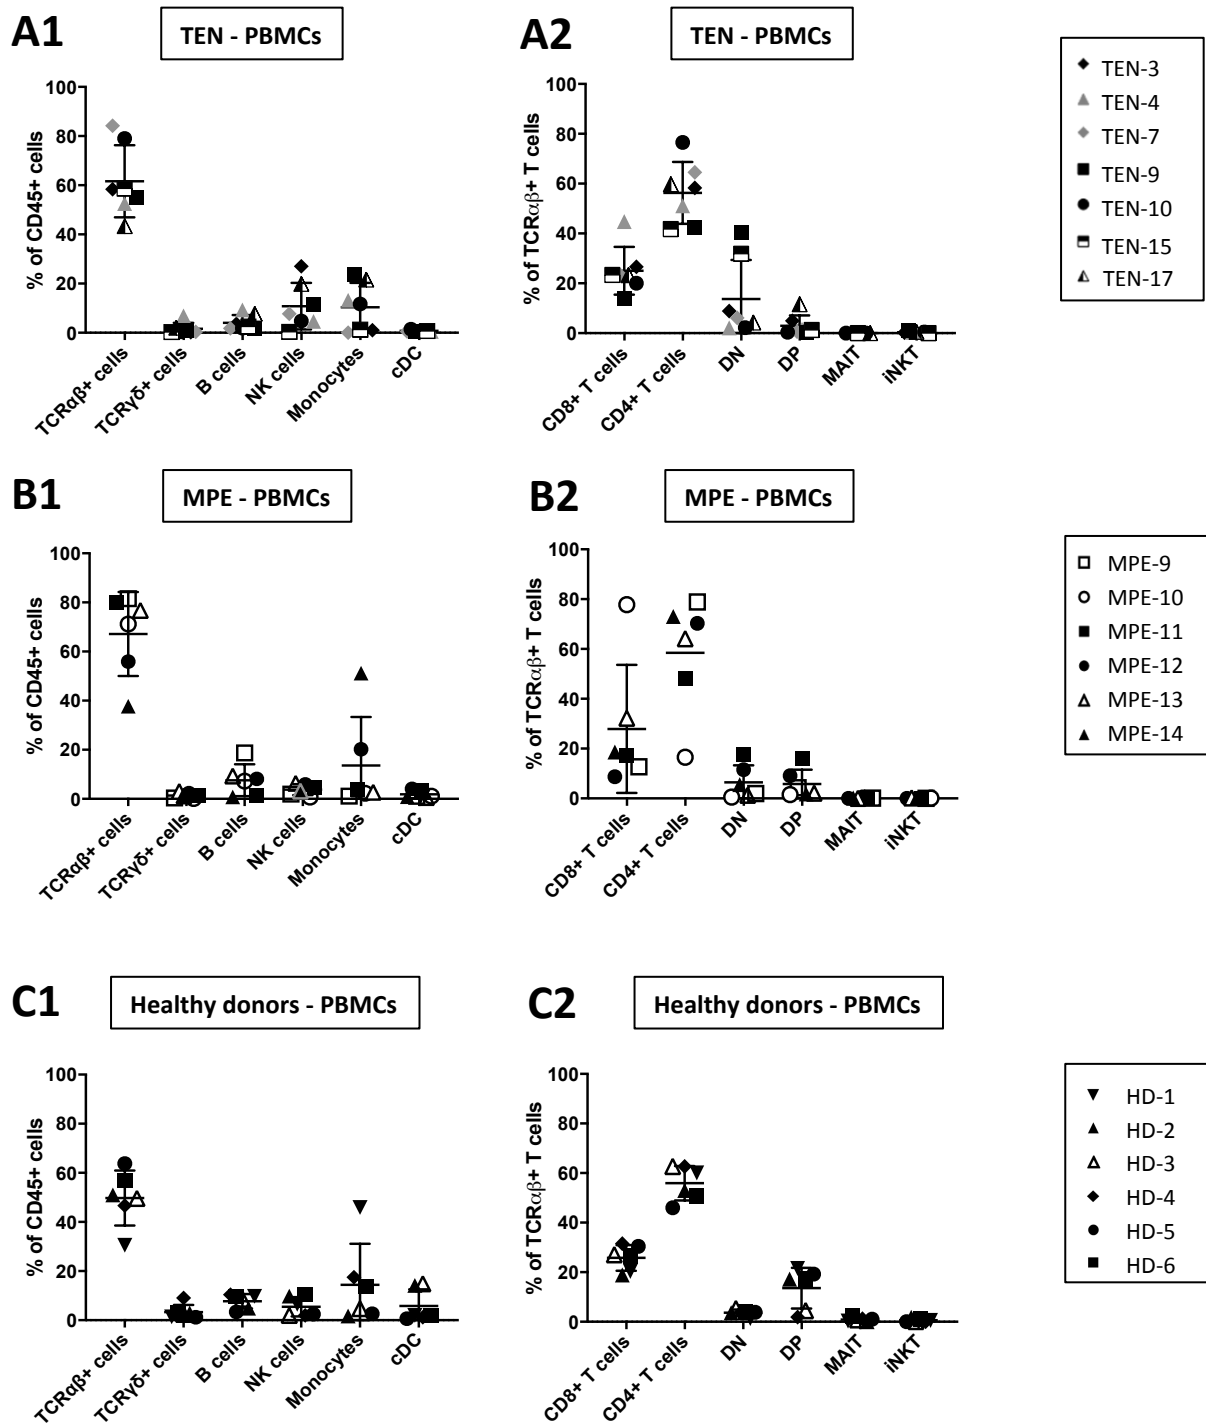

Figure S3

**Concatenated CD8 + T cells  
TEN-MPE-Healthy donors  
Skin/Blisters and PBMCs**

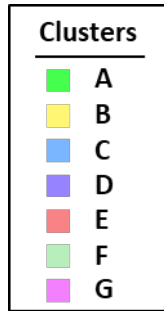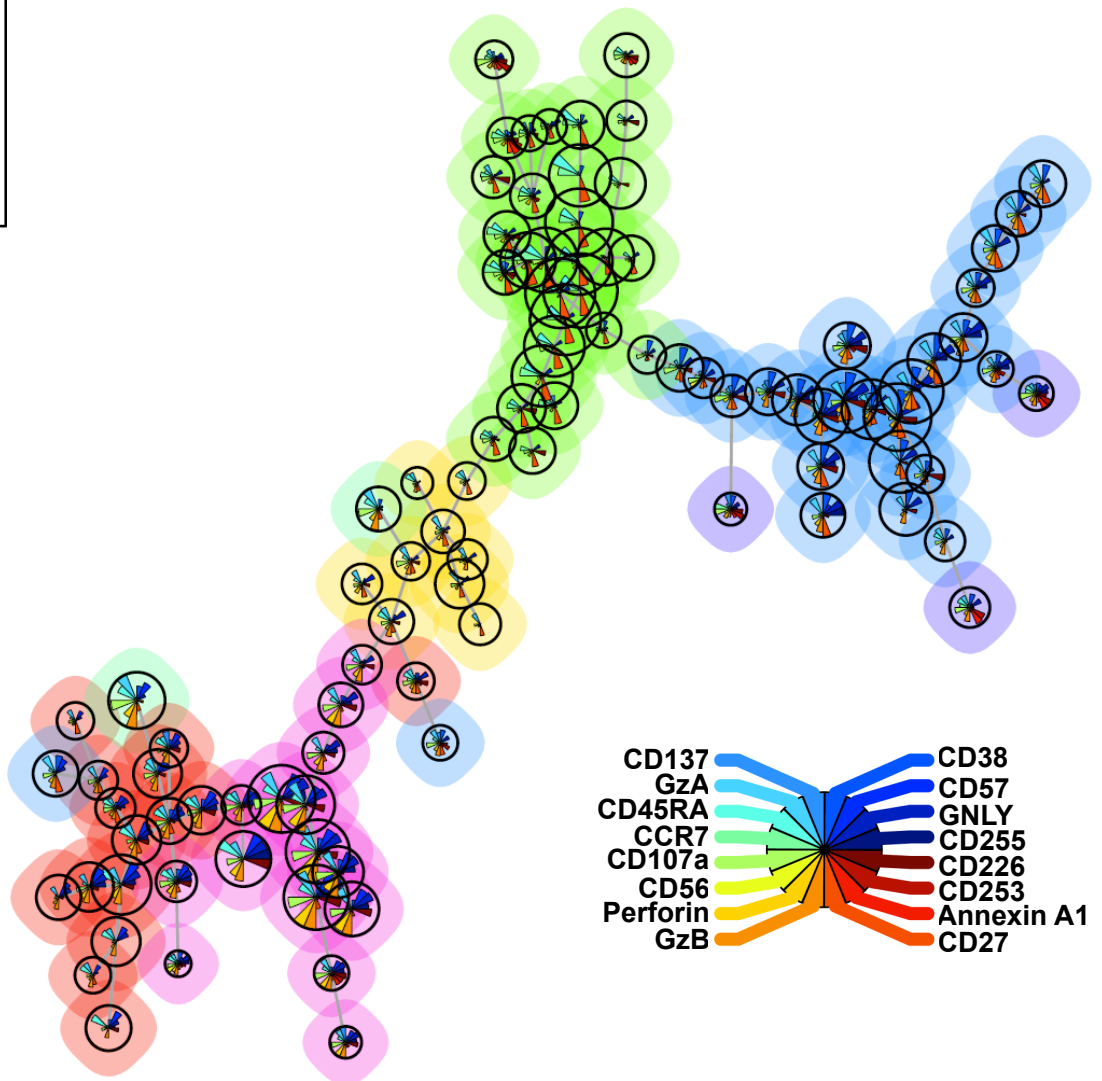

Figure S4

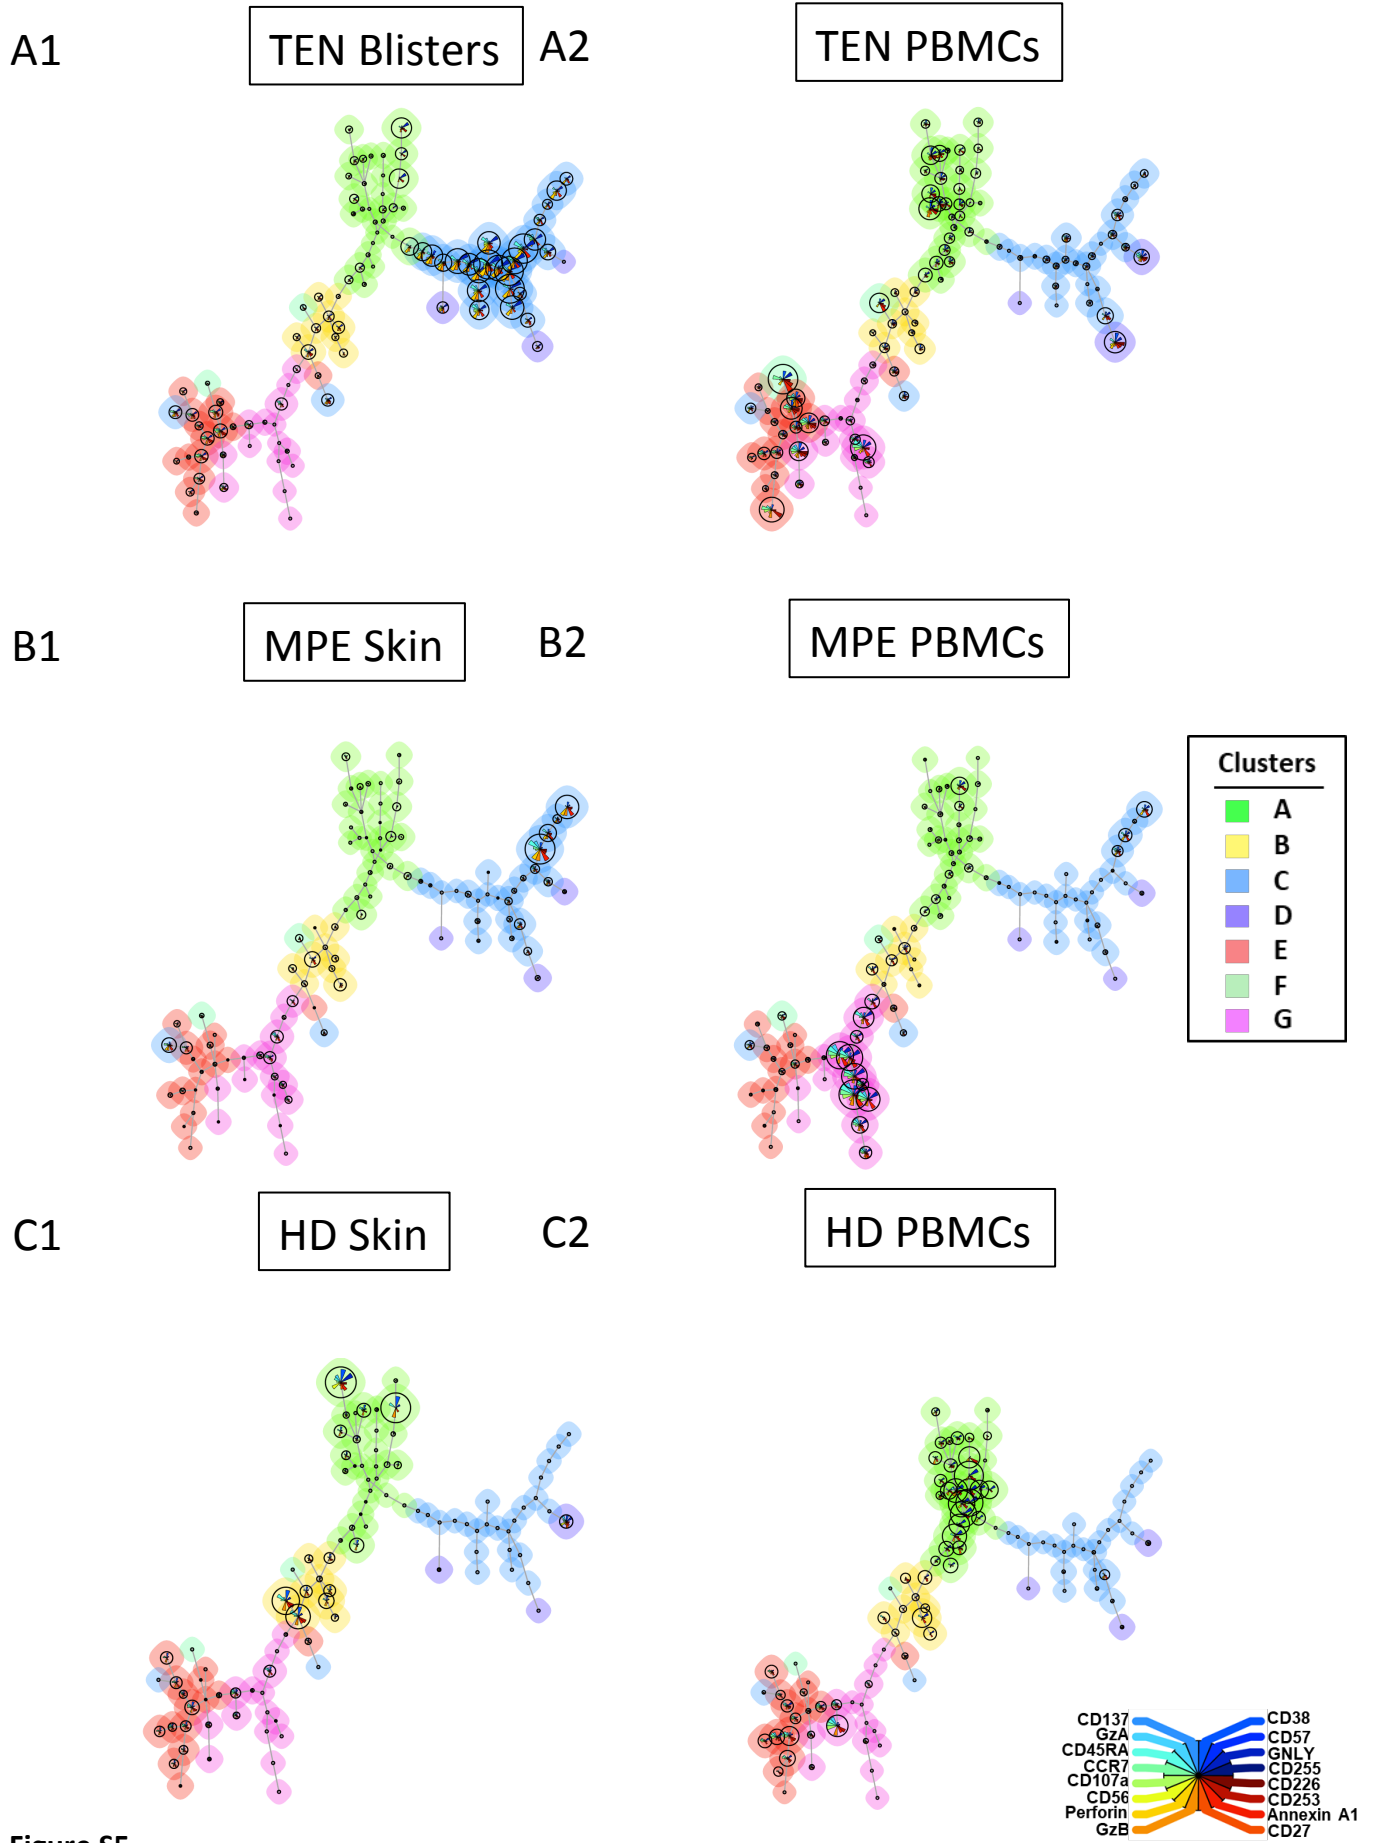

Figure S5

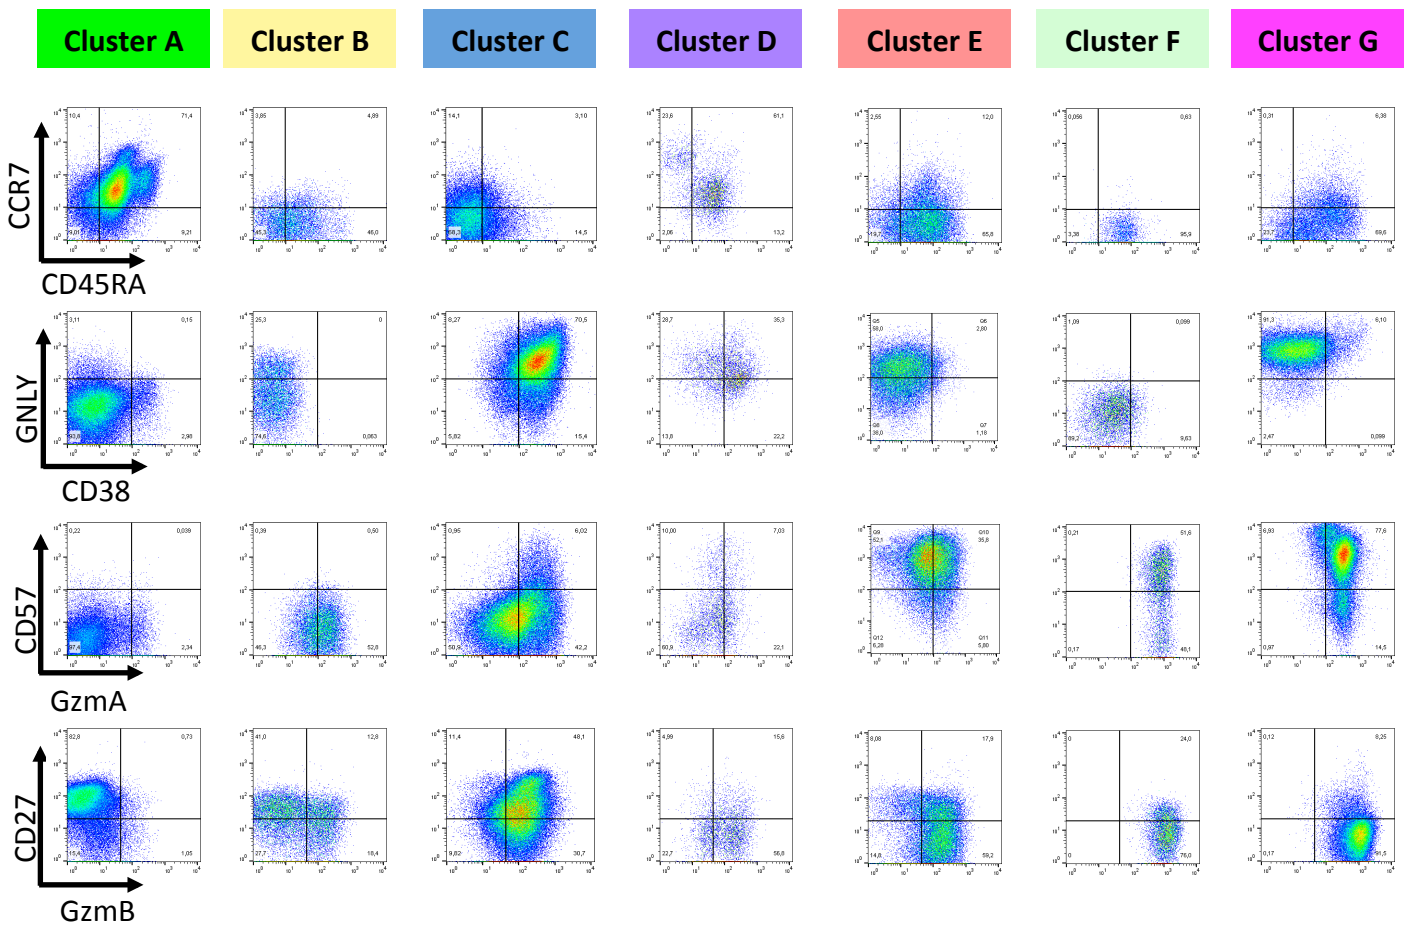

Figure S6

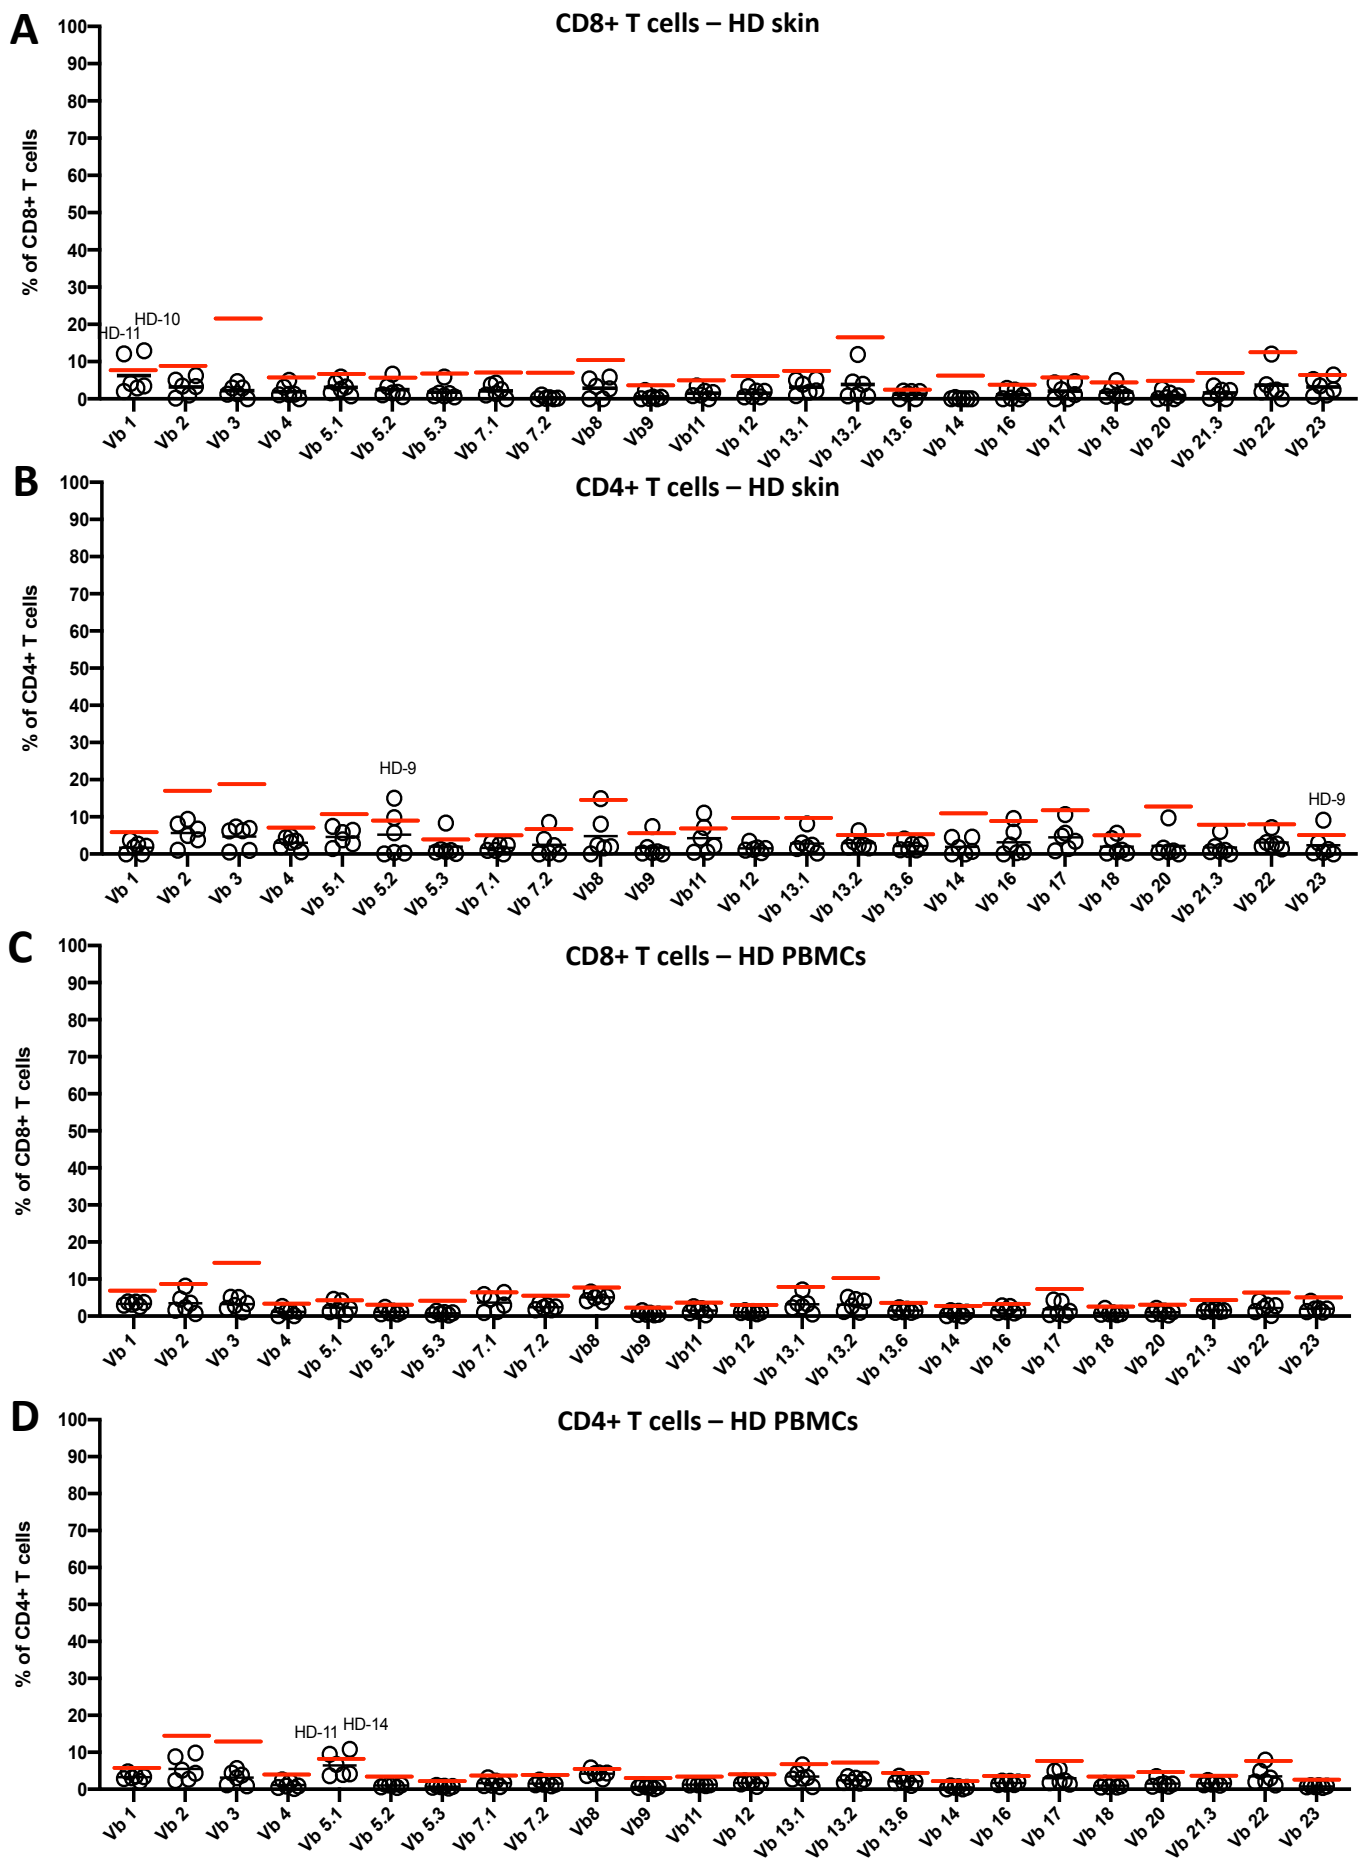

Figure S7

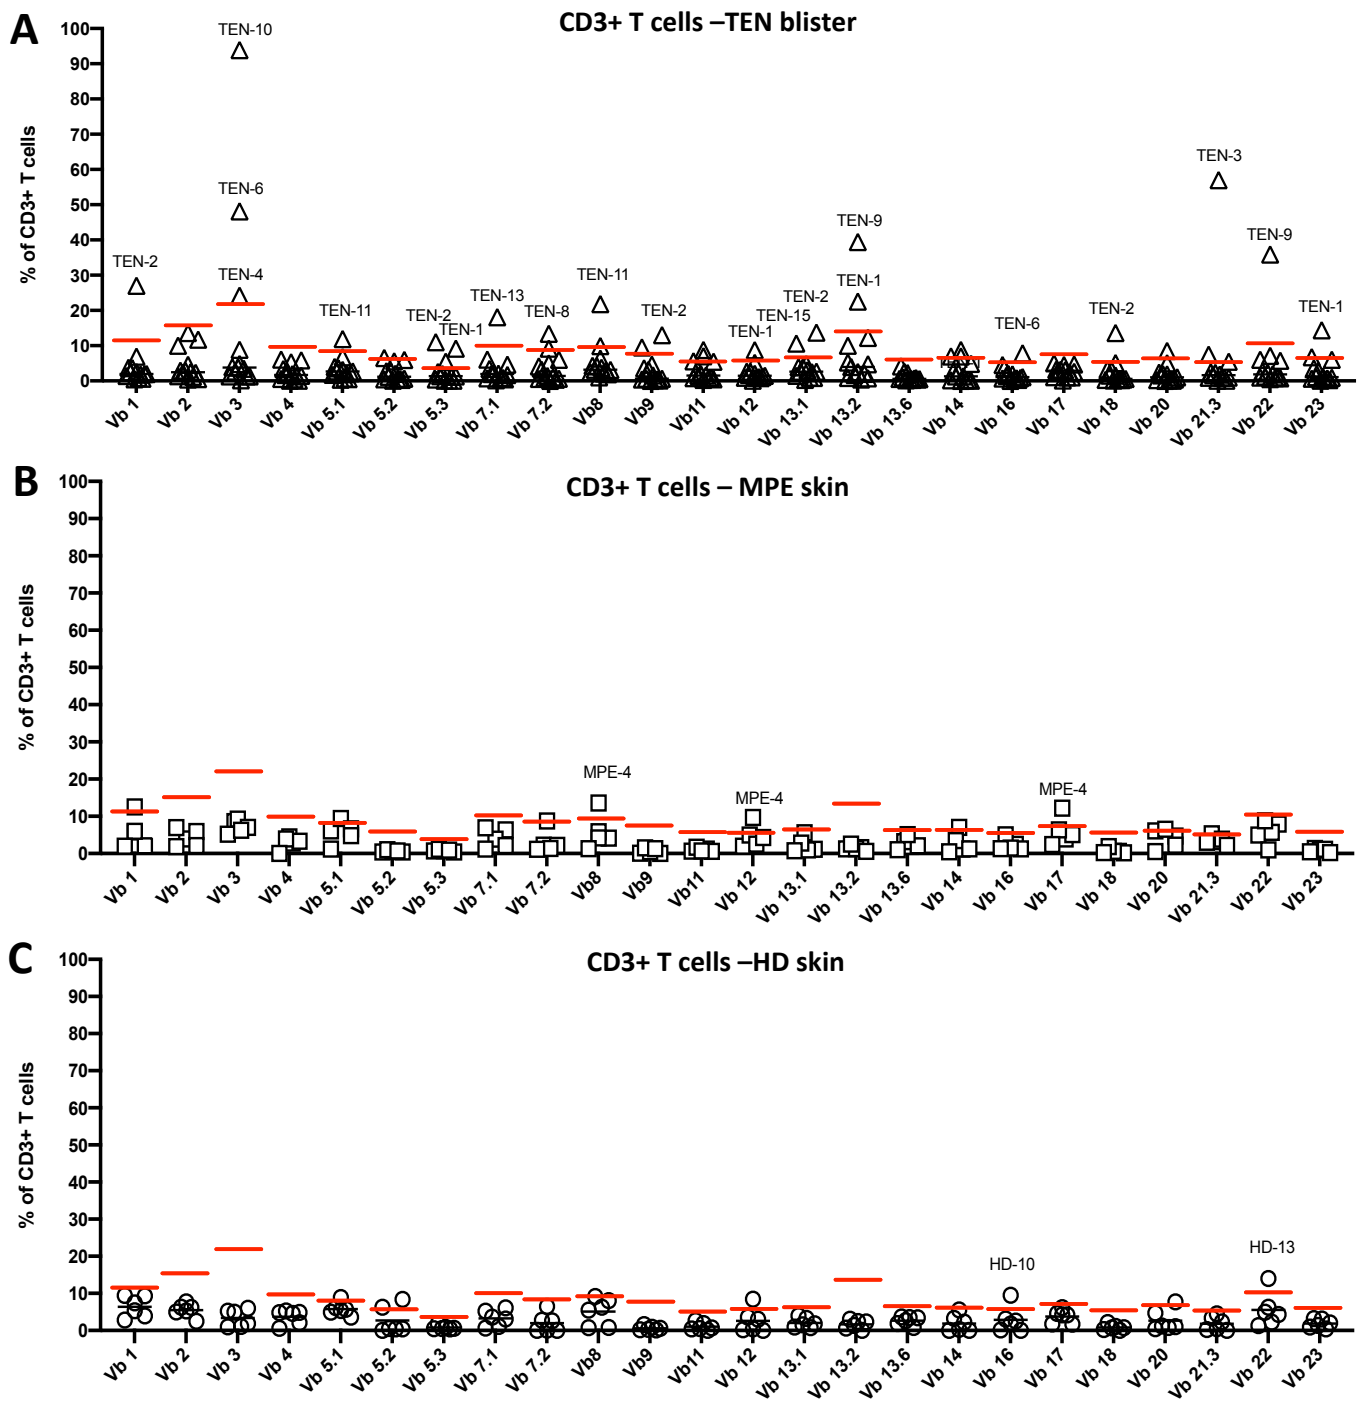

Figure S8

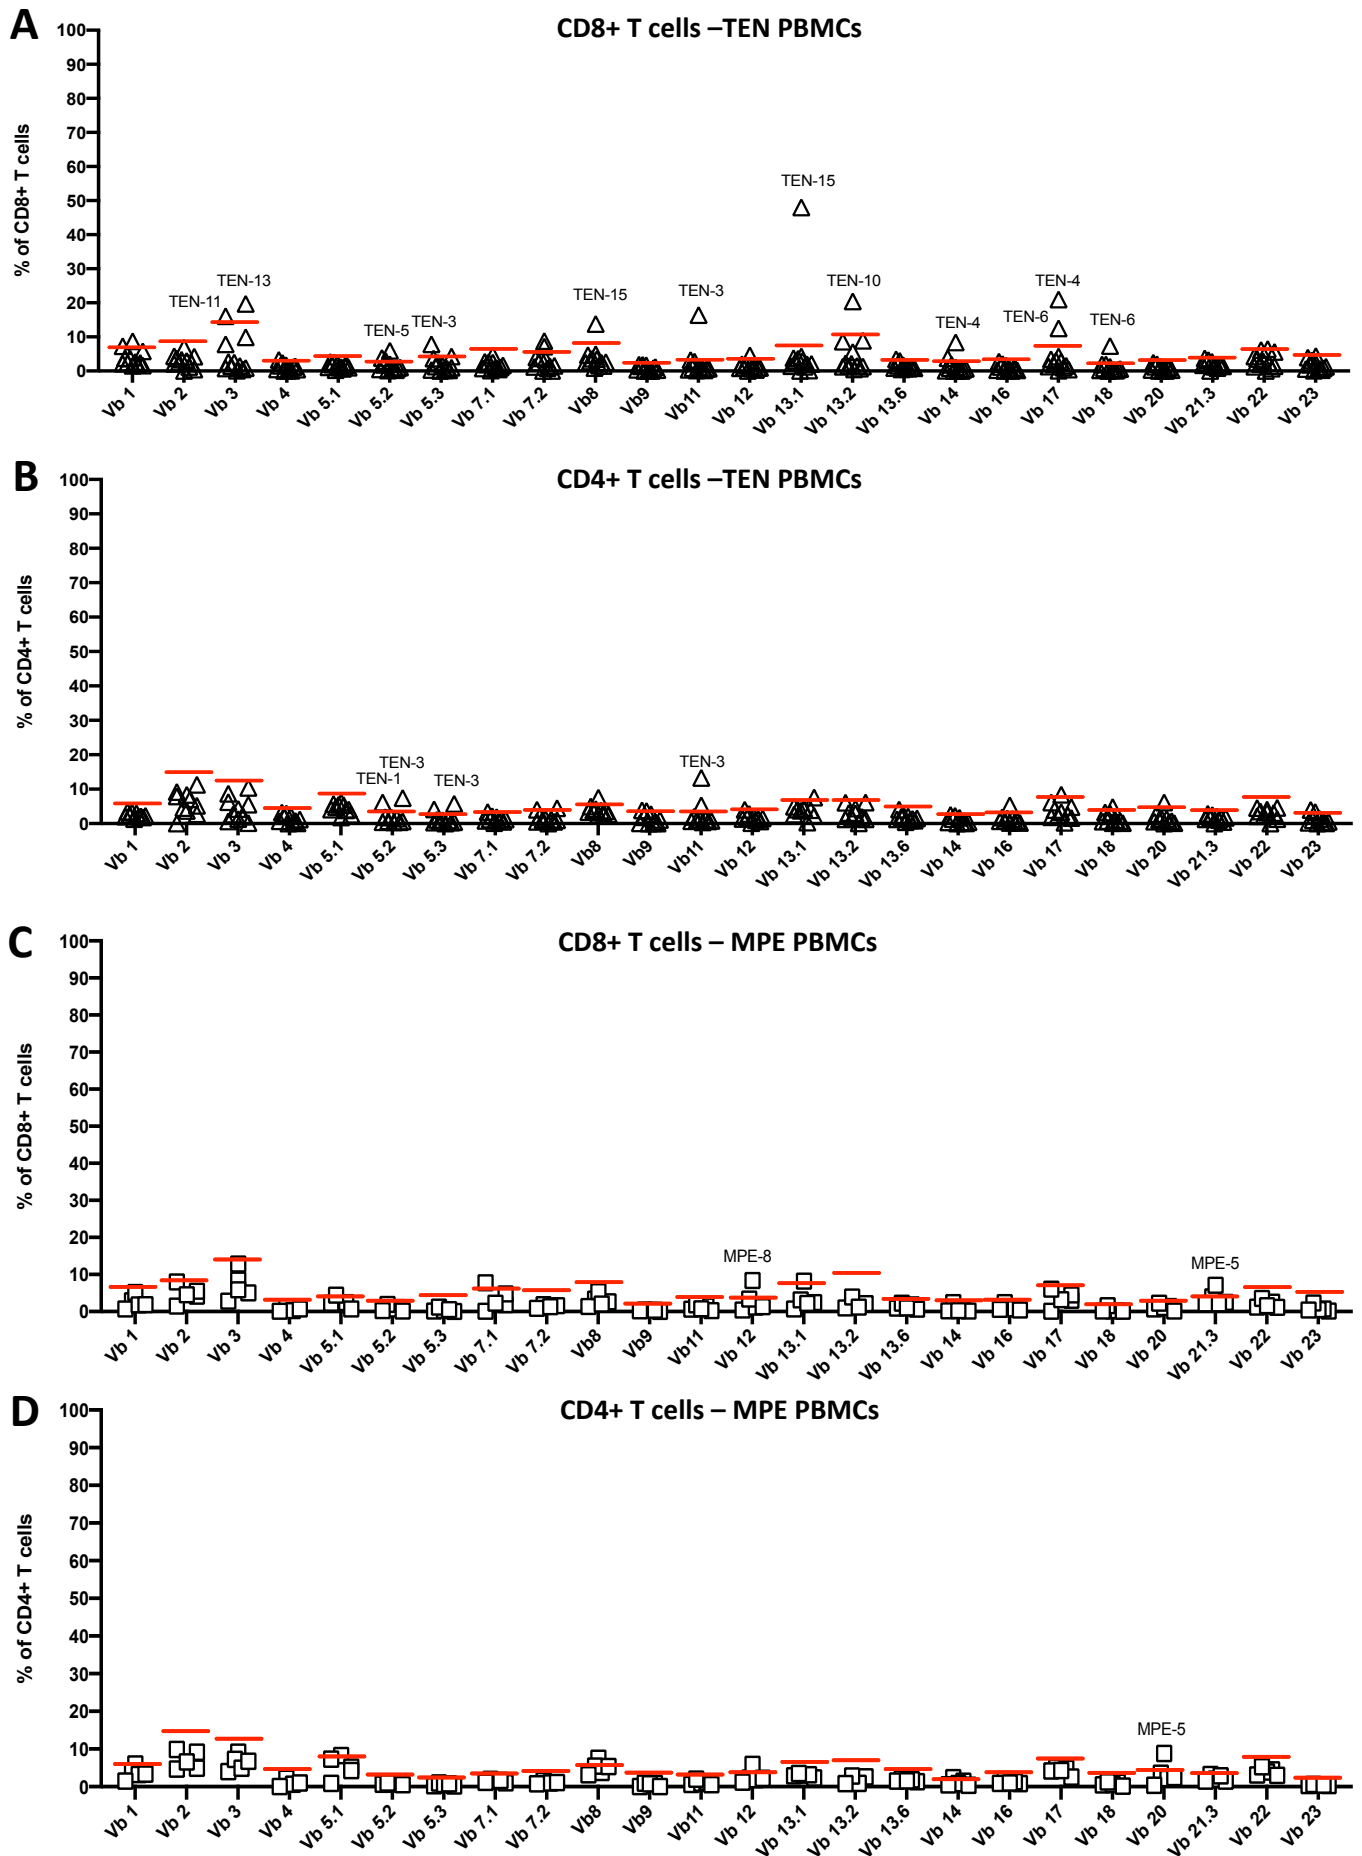

Figure S9



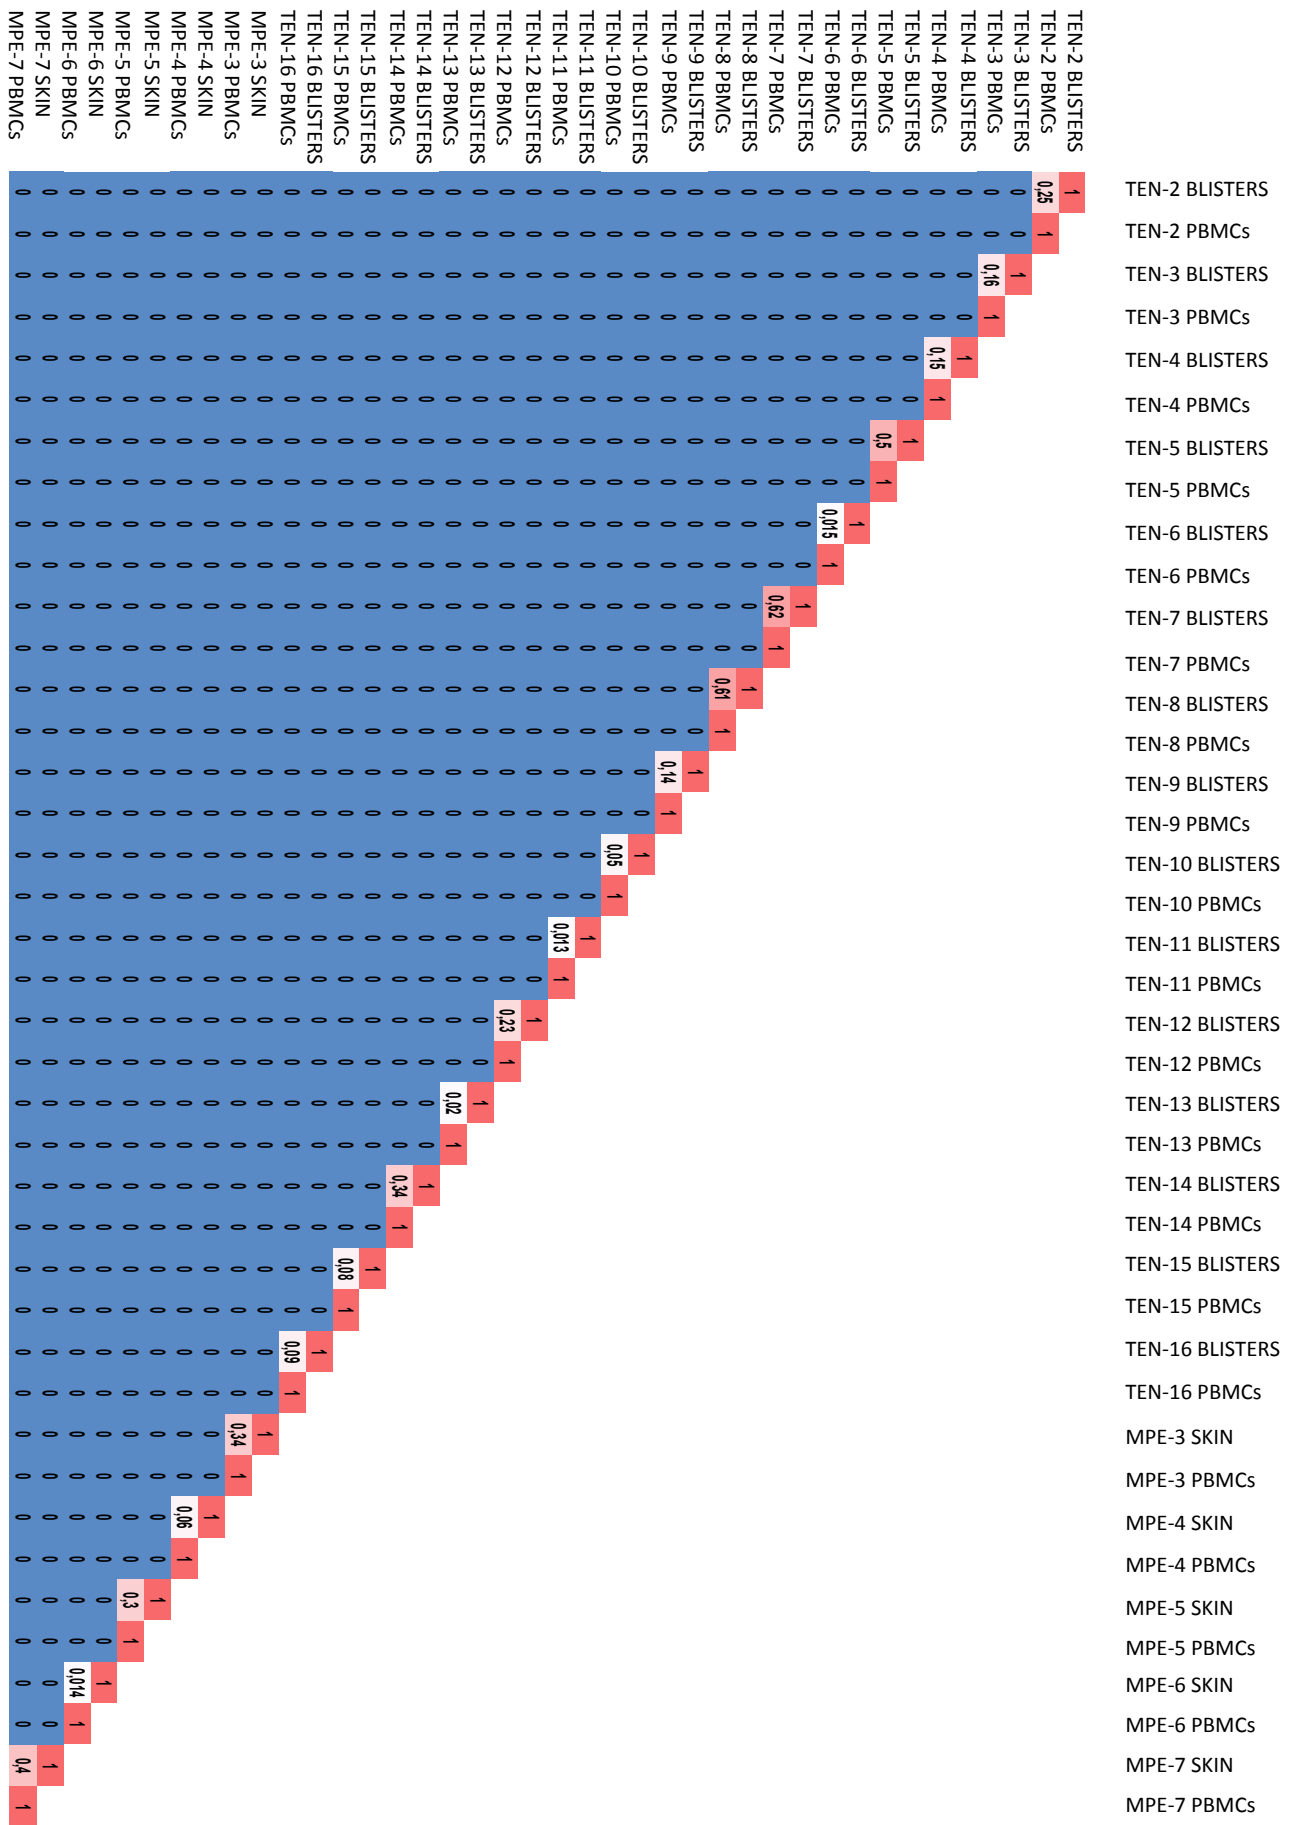

Figure S10

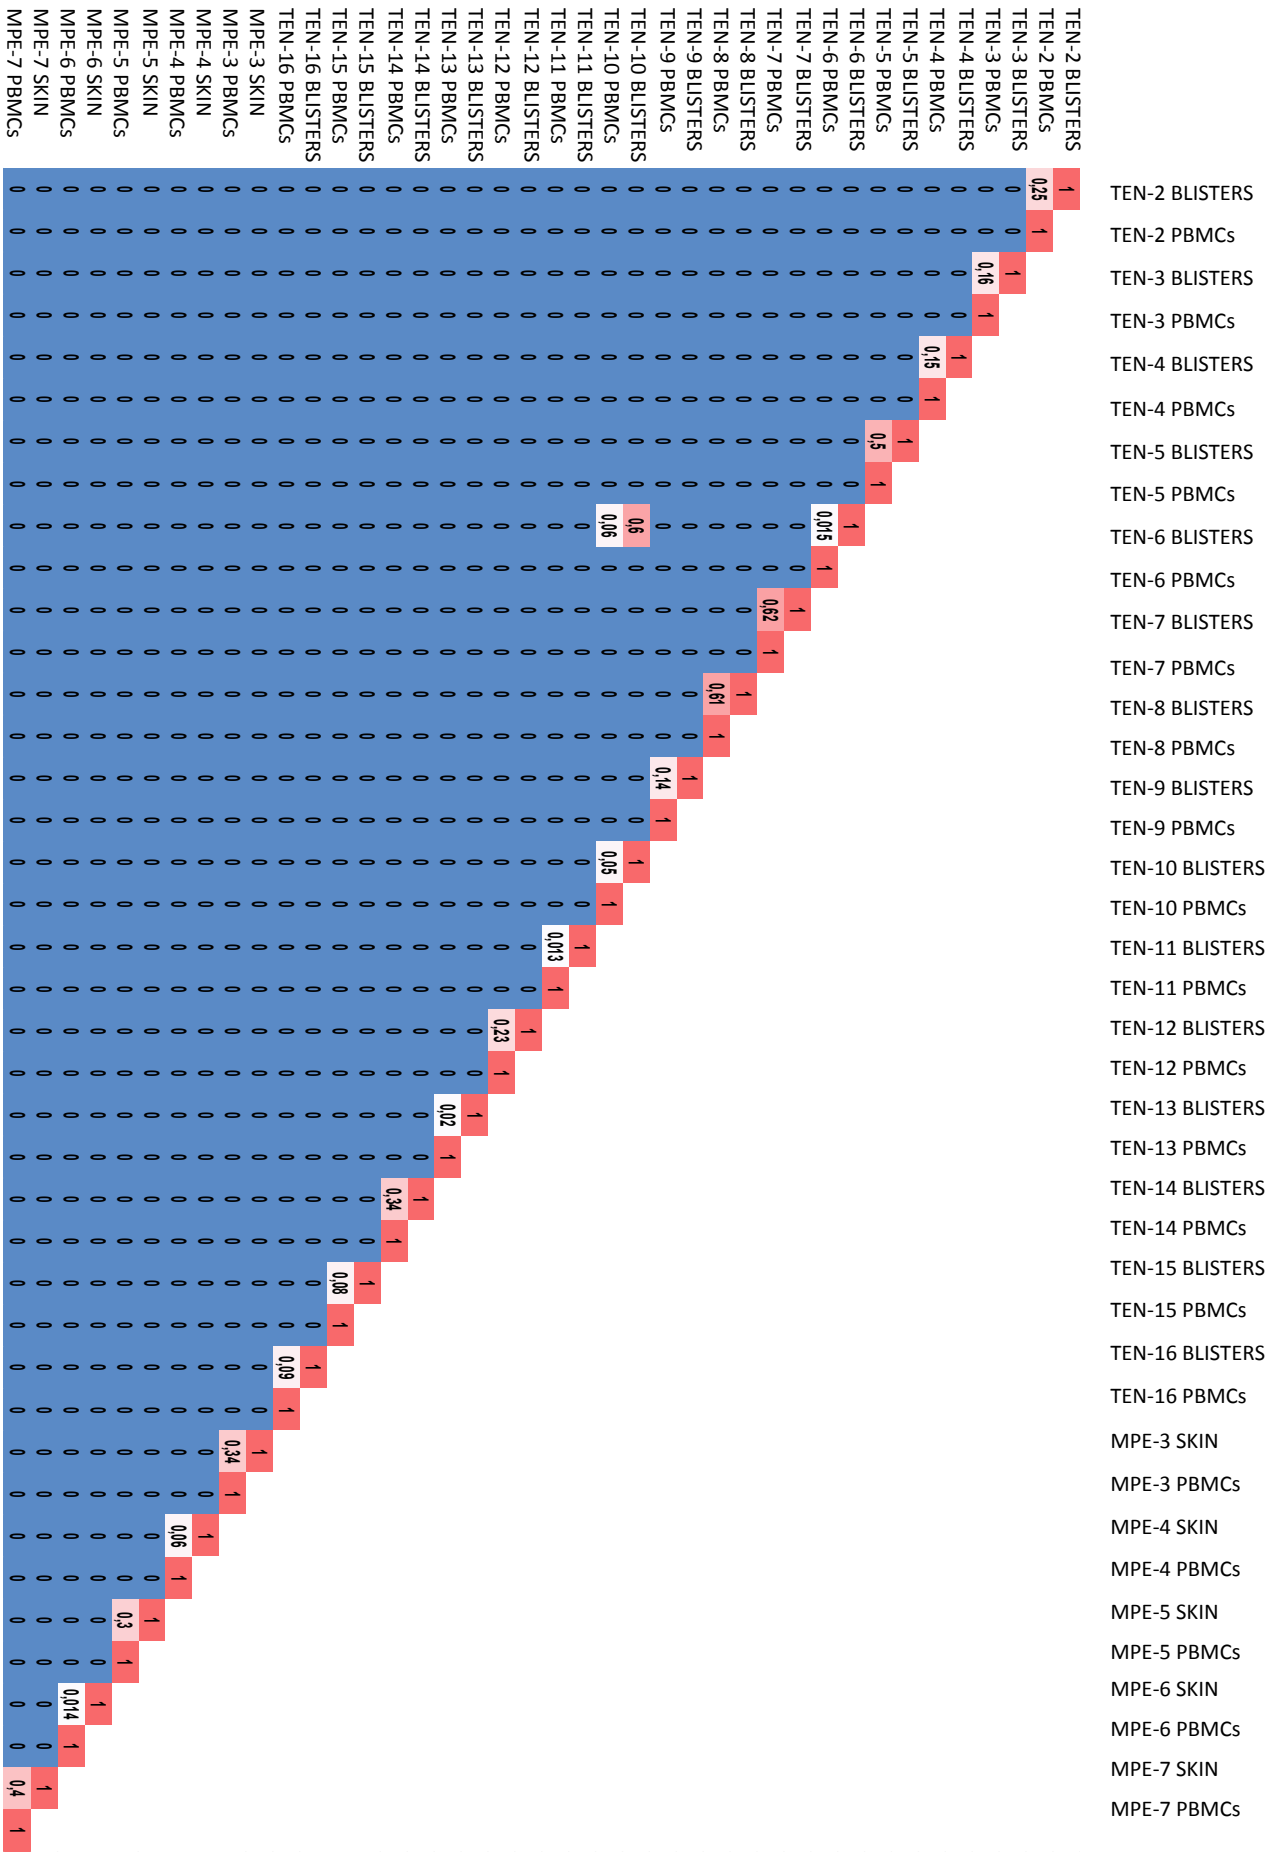

Figure S11

TEN

MPE

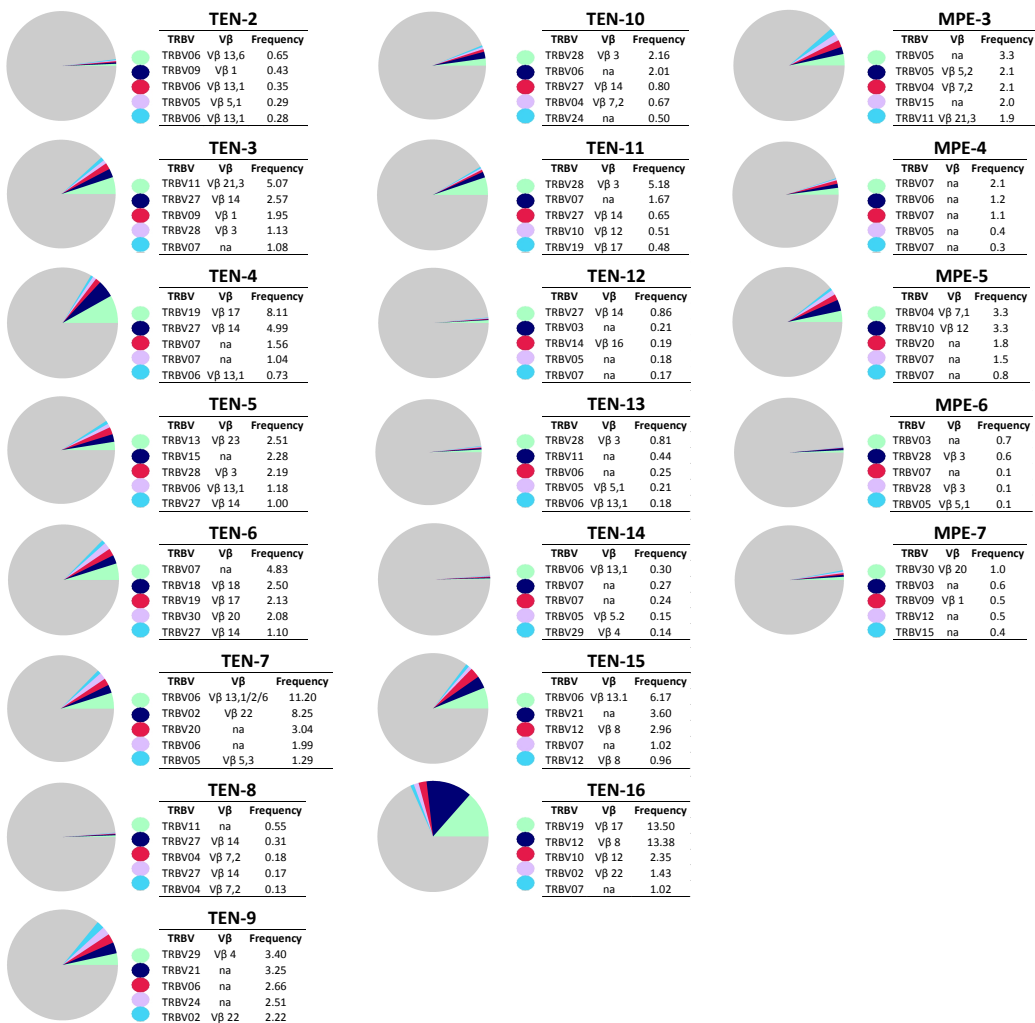

Figure S12

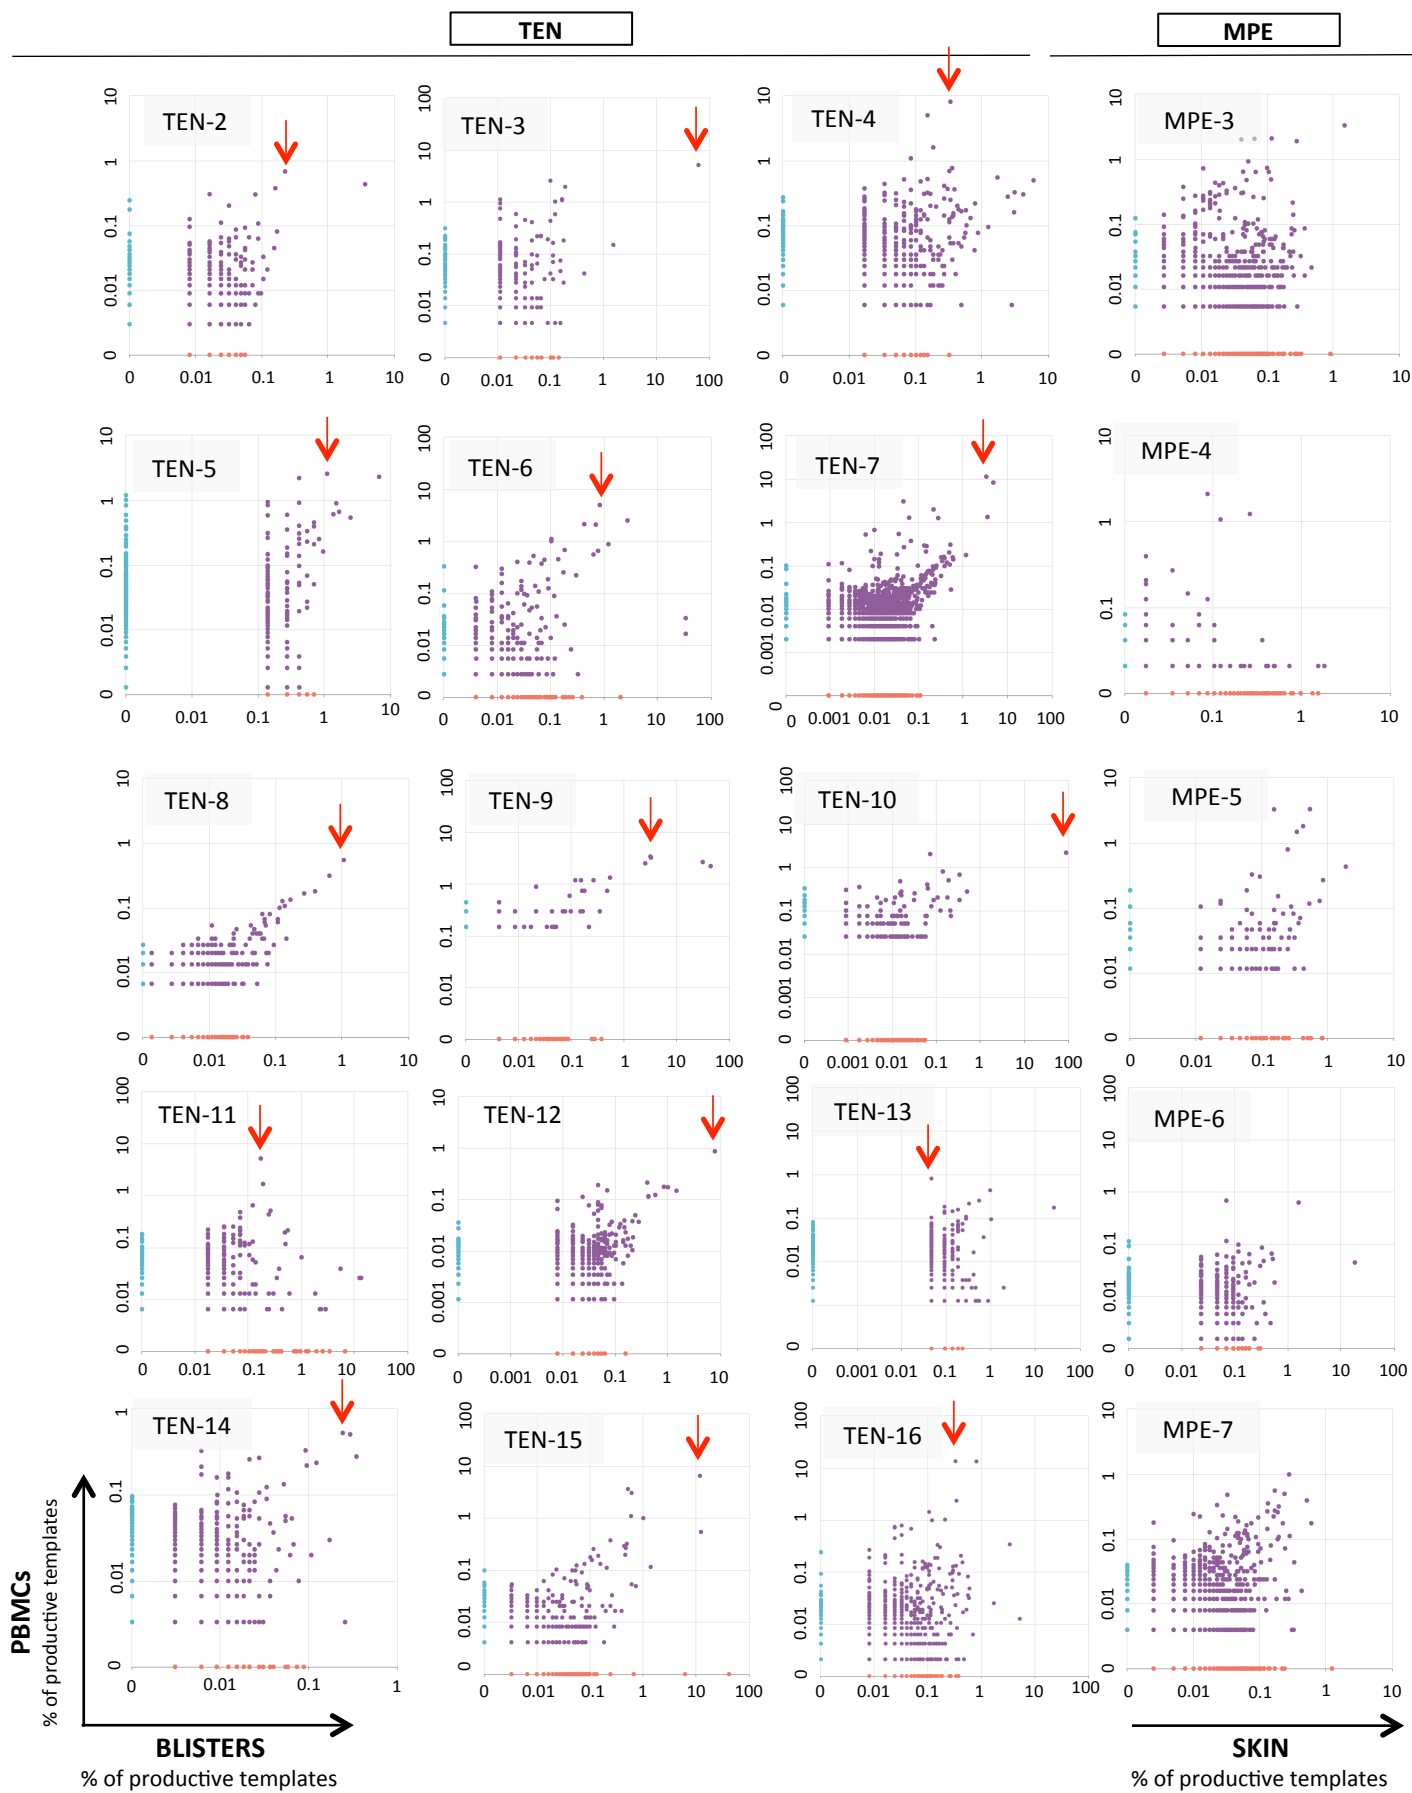

Figure S13

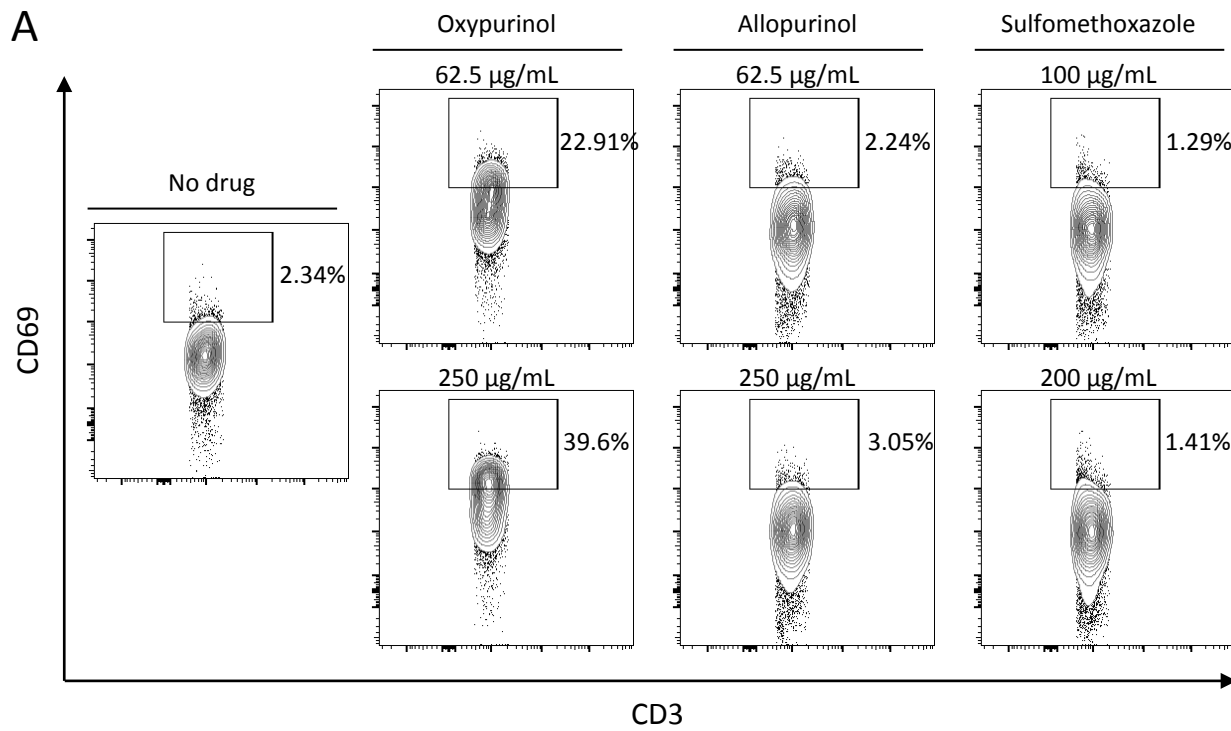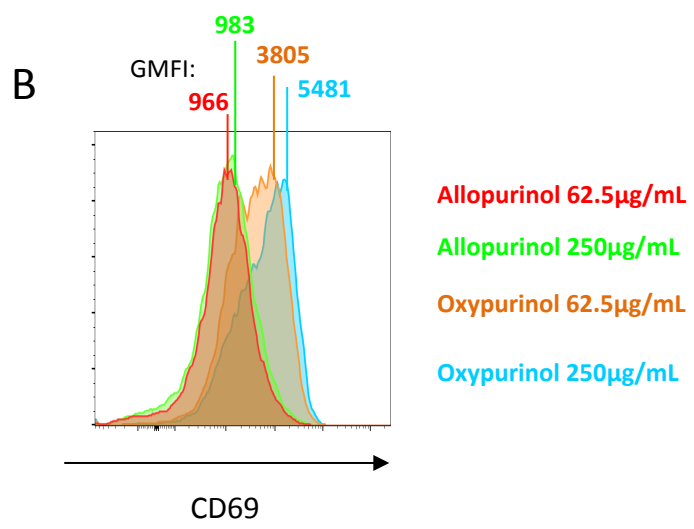

Figure S14

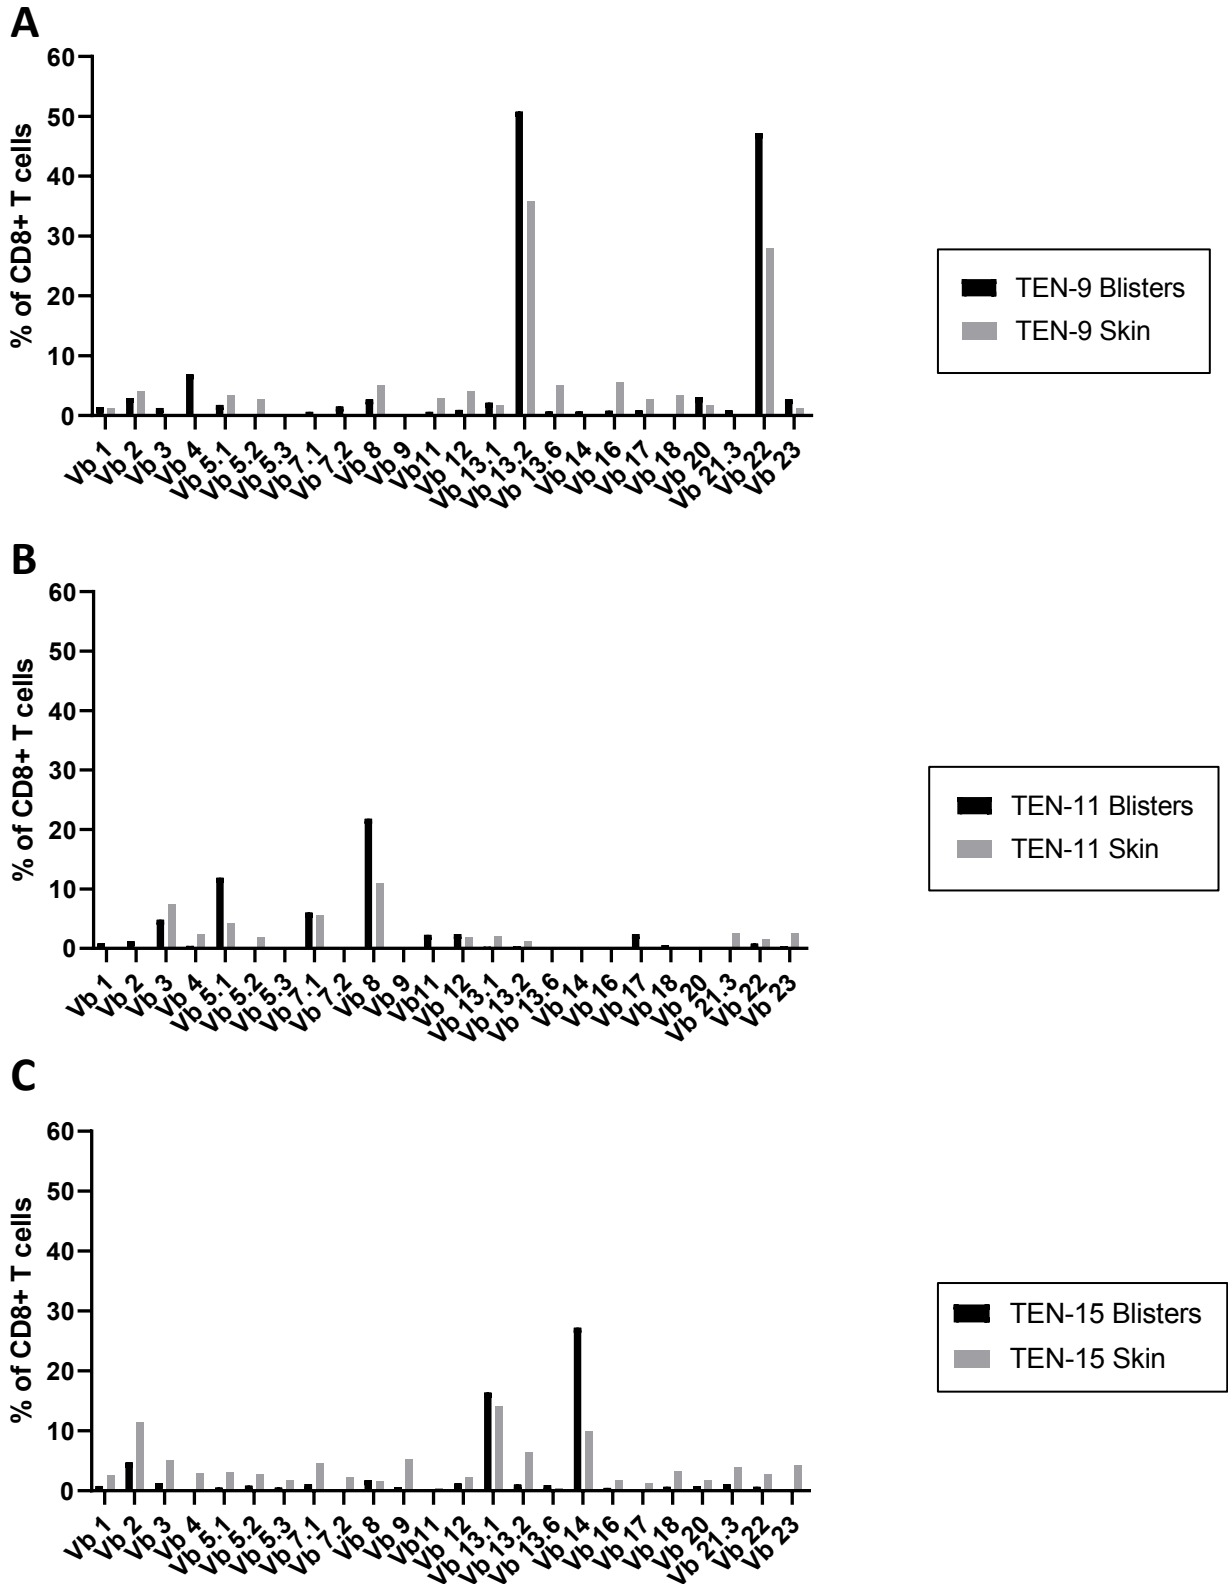

Figure S15

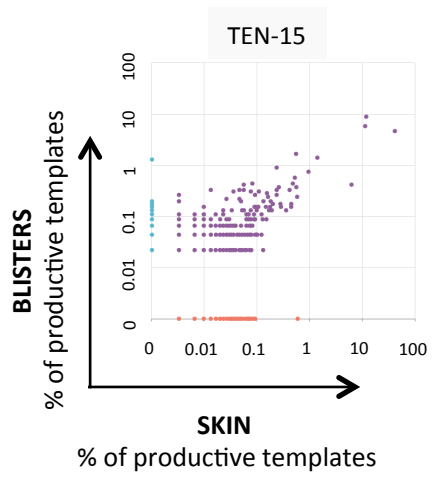

Figure S16

**A**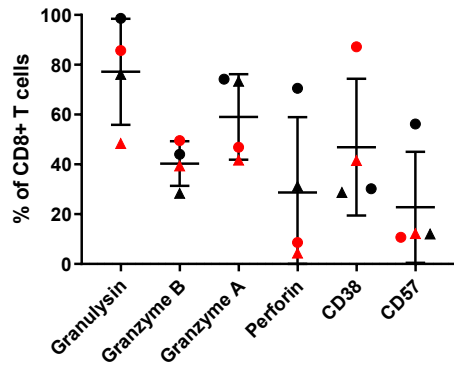**B**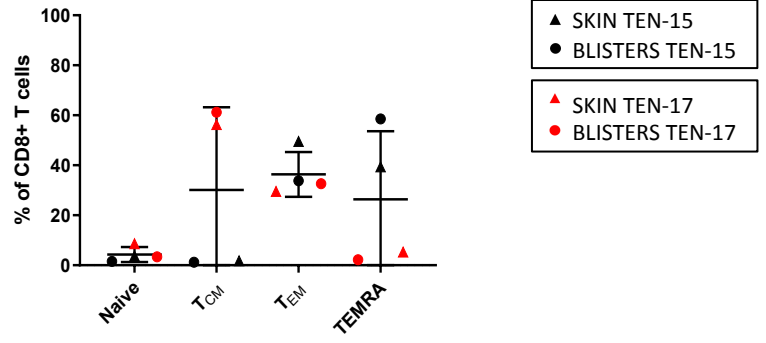**Figure S17**



## Supplementary Figure legends

### Figure S1. Lineage gating strategy used for supervised analysis of mass cytometry data.

Representative example of the gating strategy used to identify leucocyte lineages and T cell subpopulations in the blister, skin and PBMC samples from TEN, MPE and healthy donors. Cells were detected using iridium staining, and doublets and beads were excluded. Live (cisplatin negative (194 Pt)) CD45<sup>+</sup> hematopoietic cells were then progressively subcategorized into different subpopulations: monocytes (CD14<sup>+</sup>), B cells (CD19<sup>+</sup>), conventional T cells (TCR $\alpha\beta$ <sup>+</sup>), gamma delta T cells (TCR $\gamma\delta$ <sup>+</sup>), NK cells (TCR $\alpha\beta$ -TCR $\gamma\delta$ -CD56<sup>+</sup>), conventional dendritic cells (cDC, CD11c+TCR $\alpha\beta$ -TCR $\gamma\delta$ -CD56<sup>-</sup>), invariant natural killer cells (iNKT, TCR $\alpha\beta$ <sup>int</sup> TCRV $\alpha$ 24<sup>+</sup>) (53), CD4<sup>+</sup> T cells (TCR $\alpha\beta$ +CD4<sup>+</sup>), CD8<sup>+</sup> T cells (TCR $\alpha\beta$ +CD8 $\beta$ <sup>+</sup>), double positives (DP, TCR $\alpha\beta$ +CD4+CD8 $\beta$ <sup>+</sup>), double negatives (DN, TCR $\alpha\beta$ +CD4-CD8 $\beta$ -TCRV $\alpha$ 7.2<sup>-</sup>) and MAIT cells (TCR $\alpha\beta$ +CD4-CD8 $\beta$ -CD8 $\alpha$  $\pm$ TCRV $\alpha$ 7.2<sup>+</sup>) (54).

### Figure S2. Immunophenotyping of leucocytes present in TEN blisters and in adjacent skin samples.

The leucocytes isolated from different bullae or adjacent non-bullous inflammatory skin from 3 subjects with TEN (black, red or blue symbols) were analyzed by mass cytometry. Scatter plots depict percentages of conventional TCR $\alpha\beta$ <sup>+</sup> lymphocytes, gamma delta T cells, B lymphocytes, NK cells, monocytes or conventional dendritic cells in hematopoietic CD45<sup>+</sup> cells (A) and percentages of CD8<sup>+</sup>, CD4<sup>+</sup>, double negative and double positive T cell subsets, as well as iNKT and MAIT cells in gated TCR $\alpha\beta$ <sup>+</sup> population (B). Mean frequencies  $\pm$  SD are also indicated.

### Figure S3: Immunophenotyping of PBMCs from TEN, MPE and healthy donors.

The PBMCs from 7 TEN patients (A), 6 MPE patients (B) and 6 healthy donors (C) were analyzed by mass cytometry. Scatter plots depict percentages of conventional TCR $\alpha\beta$ <sup>+</sup> lymphocytes, gamma delta T cells, B lymphocytes, NK cells, monocytes or conventional dendritic cells in hematopoietic CD45<sup>+</sup> cells (A1-C1), and percentages of CD8<sup>+</sup>, CD4<sup>+</sup>, double negative and double positive T cell subsets, as well as iNKT and MAIT cells in gated TCR $\alpha\beta$ <sup>+</sup> population (A2-C2). Mean frequencies  $\pm$  SD are also shown. The frequencies of each subset in TEN and MPE samples compared to healthy donor samples were not statistically different.

### Figure S4: Minimal spanning tree magnification. All samples - Skin and PBMC of TEN, MEP and healthy donors.

High-dimensional cell analysis using FlowSOM was conducted, as in Figure 2, on concatenated CD8<sup>+</sup> T cell data (300 cells/sample) obtained from both blister, skin and PBMC samples from TEN and MPE patients and healthy donors (as reported in Table S1). Minimal spanning tree

(with 100 nodes) and automatically subcategorized clusters (clusters A, B, C, D, E, F, G) are depicted. Each node includes phenotypically similar cells and the size of the node indicates the number of cell events. At the center of each node is represented a star chart. Each coloured star branch corresponds to the specific markers (CD45RA, CCR7, granzyme B (GzB), gA (GzA), granulysin (GNLY), perforin, CD27, CD38, CD56, CD57, CD107a, CD137, CD226, CD253, CD255, annexin A1) used for phenotypic comparison. The height of each star branch indicates the mean intensity: if the part reaches the border of the circle, the cells have a high expression for the marker.

**Figure S5: Minimal spanning trees obtained after FlowSOM analysis of concatenated CD8+ T cell data from TEN, MPE and healthy donor samples.** High-dimensional cell analysis using FlowSOM was conducted on concatenated CD8+ T cell data (300 cells/sample) from either blister, skin or PBMC samples from subjects with TEN (**A**), with MPE (**B**) and from healthy donors (**C**), as reported in **Table S1**.

**Figure S6. FACS illustrations of the seven FlowSOM CD8+ T cell clusters.** The 7 FlowSOM clusters (A-G) identified by high-dimensional analysis in Figure 2 were displayed for standard FACS plots visualization, using CCR7, CD45RA, granulysin (GNLY), CD38, CD57, granzyme A (GzA), CD27 and granzyme B (GzB) markers.

**Figure S7: TCR V $\beta$  repertoire usage in CD8+ and CD4+ T cell subsets isolated from the skin and PBMCs of healthy donors.** The leucocytes isolated from the skin (**A & B**) and PBMCs (**C & D**) of 12 (HD-9 to HD-20) healthy donors were analysed by flow cytometry. Histograms depict percentages of the 24 TCR V $\beta$  chains in gated CD8+ (**A & C**) and CD4+ (**B & D**) T cell subsets, using the IOTest<sup>®</sup> Beta Mark TCR V $\beta$

Repertoire Kit. Each round symbol represents a different subject. The red bar illustrates the threshold value from which TCR V $\beta$  chains were considered as highly expanded (using Tukey's rule for the detection of outliers, i.e.  $Q3 + 1.5 \times IQR$ ).

**Figure S8: TCR V $\beta$  repertoire usage in CD3+ T cells isolated from the skin of TEN, MPE and healthy individuals.** The leucocytes isolated from the blister fluids of 13 subjects with TEN (**A**), the lesional skin of 5 subjects with MPE (**B**) and the healthy skin of 6 donors (**C**) were analysed by flow cytometry, as in **Figure 3**. Each symbol (triangles for TEN, squares for MPE, rounds for healthy donors) represents a different subject. The red bar illustrates the threshold value from which TCR V $\beta$  chains

were considered as highly expanded (using Tukey's rule for the detection of outliers, i.e.  $Q3 + 1.5 \times IQR$ ).

**Figure S9: TCR V $\beta$  repertoire usage in CD8+ and CD4+ T cell subsets isolated from PBMCs of TEN and MPE patients.** PBMCs from 13 subjects with TEN (A & B) and 5 subjects with MPE (C & D) were analysed by flow cytometry. Histograms depict percentages of 24 TCR V $\beta$  chains in gated CD8+ (A & C) and CD4+ (B & D) T cell subsets, using the IOTest<sup>®</sup> Beta Mark TCR V $\beta$  Repertoire Kit. Each symbol (triangles for TEN, squares for MPE) represents a different subject. The red bar illustrates the threshold value from which TCR V $\beta$  chains were considered as highly expanded (using Tukey's rule for the detection of outliers, i.e.  $Q3 + 1.5 \times IQR$ ).

TEN-2 (both CD8 and CD4+ T cells; not done) and TEN-15 (CD4+ T cells; technical issue) data are not depicted in the scatter plots.

**Figure S10: Clonotype nucleotide sequence overlap between blister and PBMC samples from TEN and MPE patients.** Morisita-Horn similarity index heatmap depicts overlap metrics (provided by ImmunoSEQ Analyzer V.3.0) for each possible pair-wise percent sharing between all pairs of TEN and MPE samples. This was computed by averaging across the two ratios of shared sequencing reads for each sample. Blue squares illustrate low (<1%) or no reads sharing between samples, white being intermediate and red being the highest level of sharing. Figures at the center of each square indicate percent sharing.

**Figure S11: Clonotype amino acid overlap between blister and PBMC samples from TEN and MPE patients.** Morisita-Horn similarity index heatmap depicts overlap metrics (provided by ImmunoSEQ Analyzer V.3.0) for each possible pair-wise percent sharing between all pairs of TEN and MPE samples. This was computed by averaging across the two ratios of shared sequencing reads for each sample. Blue squares illustrate low (<1%) or no reads sharing between samples, white being intermediate and red being the highest level of sharing. Figures at the center of each square indicate percent sharing.

**Figure S12: Frequency and TRBV usage of the highly expanded TCR $\beta$  clonotypes in PBMC samples.** The leucocytes isolated from the PBMCs of 15 subjects with TEN and 5 subjects with MPE were evaluated using HTS of the TCR. Pie charts illustrate frequencies of the 5 most expanded TCR $\beta$  clonotypes (measured as % of unique CDR3 sequence among all productive rearrangements within a sample). Colours indicate the respective TRBV usage of each TCR $\beta$  clonotypes. Grey indicates the

remaining clonotypes found in the same sample. TCR $\beta$  chain amino acid sequences are also provided. Cross-reference for the corresponding anti-V $\beta$  mAb nomenclature is also provided.

**Figure S13: Frequency of the most expanded TCR $\beta$  clonotypes in the blood and the blisters or skin of TEN and MPE patients.** Comparison of TCR $\beta$ -chain CDR3 sequences in paired blister, skin and PBMC samples. Each dot of the heat map scatters represent one clone and the percentage of total productive templates of this given clone in skin and PBMC samples of TEN or MPE patients. Clones uniquely found in skin samples are located on the x-axis in red, clones uniquely present in PBMCs are located on the y-axis in blue; and clones found in both samples are in violet. Most expanded clones in the blood are shown with an arrow (such clones were used for correlation calculations in Figure 6).

**Figure S14: FACS plot illustration of drug-induced activation of TCR $\alpha\beta$  Skw3 transductants.** Skw3 cell lines engineered for the expression of TCRs bearing V $\alpha$  and V $\beta$  chains from the top clone found in patient TEN-3 were stimulated *in vitro* with EBV-transformed B cells in presence of graded doses of different drugs (oxypurinol, allopurinol and sulfamethoxazole), or left unpulsed (no drug). Contour plots represent the percentage of CD69 expression in CD3+Skw3 transductants (A). Histograms represent the geometric mean fluorescence intensity (GMFI) of CD69 marker. Each color represents a different stimulatory condition. The GMFI values are listed above each histogram (B).

**Figure S15: TCR V $\beta$  repertoire usage in T cell subsets isolated from blister and adjacent skin samples of patients TEN-9, -11 and -15.** The leucocytes isolated from the blister and adjacent skin samples of 3 subjects with TEN (TEN-9, TEN-11 and TEN-15) were analyzed by flow cytometry. Histograms depict percentages of 24 TCR V $\beta$  chains in gated CD8+ T cell subsets, using the IOTest<sup>®</sup> Beta Mark TCR V $\beta$  Repertoire Kit.

**Figure S16: Frequency of the most expanded TCR $\beta$  clonotypes in paired blister and adjacent skin samples of patient TEN-15.** Comparison of TCR $\beta$ -chain CDR3 sequences in paired blister and adjacent skin samples. Each dot of the heat map scatters represents one clone and the percentage of total productive templates of this given clone in respective sample. Clones uniquely found in adjacent skin sample are located on the x-axis in red, clones uniquely present in blister sample are located on the y-axis in blue; and clones found in both samples are in violet.

**Figure S17: Immunophenotyping of leucocytes present in TEN blisters and adjacent skin samples.**

The leucocytes isolated from the blister (dots) and adjacent skin (triangles) samples of 2 subjects with TEN (TEN-15 in black and TEN-17 in red) were analyzed by mass cytometry. Scatter plots depict percentages  $\pm$  SD of Granulysin, Granzyme B, Granzyme A, Perforin, CD38 and CD57 markers in total CD8<sup>+</sup> T cells (**A**). Frequencies  $\pm$  SD of naïve (CD45RA+CCR7<sup>+</sup>), central memory T cells (T<sub>CM</sub>; CD45RA-CCR7<sup>+</sup>), effector memory T cells (T<sub>EM</sub>; CD45RA-CCR7<sup>-</sup>) and effector memory T cells expressing CD45RA (T<sub>EMRA</sub>; CD45RA+CCR7<sup>-</sup>) in total CD8<sup>+</sup> T cells are also shown (**B**).
